# Supplementary material for: Diagnosis, Treatment and Long-Term Management of Vitamin B12 Deficiency in Adults: A Delphi Expert Consensus
Source: J Clin Med. 2024 Apr 10;13(8):2176. doi: 10.3390/jcm13082176 (PMC11050313; doi:10.3390/jcm13082176)
Supplement: Supplementary file 1 [file jcm-13-02176-s001.zip]

Archive with 5 entries (5 files):
- Figure S1.TIF
- Figure S2.TIF
- Figure S3.TIF
- Supplemental Tables Revised_Proof.pdf
- Table S3 Search Results Proof.xlsx
