# Supplementary material for: Diagnosis, Treatment and Long-Term Management of Vitamin B12 Deficiency in Adults: A Delphi Expert Consensus
Source: J Clin Med. 2024 Apr 10;13(8):2176. doi: 10.3390/jcm13082176 (PMC11050313; doi:10.3390/jcm13082176)
Supplement: Supplementary file 1 [file jcm-13-02176-s001.zip › Table S3 Search Results Proof.xlsx]

## Sheet: csv-1AND2AND3N-set.csv
Title and Abstract Screening
PMID	PMID,Title,Authors,Citation,First Author,Journal/Book,Publication Year,Create Date,PMCID,NIHMS ID,DOI	Internal # ID	Red = Excluded; Green = Included
36697109	36697109,"Clinical Course of Vitamin B12 Deficiency and Associated Risk Factors in Patients After Total Gastrectomy for Gastric Cancer","Aoyama T, Hara K, Maezawa Y, Kazama K, Hashimoto I, Sawazaki S, Komori K, Tamagawa H, Tamagawa A, Kano K, Cho H, Morita J, Segami K, Ishimoto M, Oshima T, Yukawa N, Rino Y.","Anticancer Res. 2023 Feb	1	clinical course after gastrectomy
36401952	36401952,"Possible association between vitamin B12 deficiency and restless legs syndrome","Geng C, Yang Z, Xu P, Zhang H.","Clin Neurol Neurosurg. 2022 Dec	2	Observational studies showing associations
36388270	36388270,"Associations of serum folate and vitamin C levels with metabolic dysfunction-associated fatty liver disease in US adults: A nationwide cross-sectional study","Jiang Y, Cao H, Chen X, Yu G, Song C, Duan H, Tian F, Wan H, Shen J.","Front Public Health. 2022 Oct 26	3	associations with fatty liver
36359805	36359805,"Cobalamin Deficiency May Induce Astrosenescence-An In Vitro Study","Rzepka Z, Rok J, Kowalska J, Banach K, Wrześniok D.","Cells. 2022 Oct 28	4	in vitro
36307840	36307840,"Vitamin B12 deficiency may play an etiological role in atrophic glossitis and its grading: A clinical case-control study","Chen GY, Tang ZQ, Bao ZX.","BMC Oral Health. 2022 Oct 28	5	atrophic glossitis
36273211	36273211,"Diagnostic reliability of serum active B12 (holo-transcobalamin) in true evaluation of vitamin B12 deficiency: Relevance in current perspective","Dastidar R, Sikder K.","BMC Res Notes. 2022 Oct 22	6	purely biomarkers
36123908	36123908,"Clinical features of different stage subacute combined degeneration of the spinal cord","Linazi G, Abudureyimu S, Zhang J, Wulamu A, Maimaitiaili M, Wang B, Bakeer B, Xi Y.","Medicine (Baltimore). 2022 Sep 16	7	SCAD
35902109	35902109,"Safety update: metformin and vitamin B(12)","","Drug Ther Bull. 2022 Sep	8	review
35896261	35896261,"Phase II Study of a Multi-center Randomized Controlled Trial to Evaluate Oral Vitamin B12 Treatment for Vitamin B12 Deficiency After Total Gastrectomy in Gastric Cancer Patients","Aoyama T, Maezawa Y, Cho H, Saigusa Y, Tamura J, Tsuchida K, Komori K, Kano K, Segami K, Hara K, Senuki K, Suzuki Y, Yamakawa M, Tamagawa H, Oshima T, Yukawa N, Rino Y.","Anticancer Res. 2022 Aug	9	Total Gastrectomy in gastric cancer
35896125	35896125,"Proton pump inhibitor use and its effect on vitamin B12 and homocysteine levels among men and women: A large cross-sectional study","Lerman TT, Cohen E, Sochat T, Goldberg E, Goldberg I, Krause I.","Am J Med Sci. 2022 Dec	10	risk group: Proton pump inhibitor
35822404	35822404,"Vitamin B12 deficiency: correction of P-methylmalonic acid for estimated glomerular filtration rate to improve diagnostic value - a confirmatory study","Nielsen S, Parkner T, Arendt JFH.","Scand J Clin Lab Invest. 2022 Jul	11	correction of biomarkers based on eGFR
35790943	35790943,"Diagnostic value of oral ""beefy red"" patch combined with fingertip blood mean corpuscular volume in vitamin B12 deficiency","Xu X, Liu Y, Xiong X, Yao Y, Hu H, Jiang X, Meng W.","BMC Oral Health. 2022 Jul 5	12	Oral ulcer, beefy red patch, and MCV
35780189	35780189,"Comment on: 'Patients with unexplained neurological symptoms and signs should be screened for vitamin B12 deficiency regardless of haemoglobin levels'","Bobat H, Akyol M, Moradi P.","Eye (Lond). 2023 Jan	13	comment
35635203	35635203,"Validation of an automated UPLC-MS/MS method for methylmalonic acid in serum/plasma and its application on clinical samples","Zheng Y, Bergström M.","Scand J Clin Lab Invest. 2022 Jul	14	Method
35546317	35546317,"Methylmalonic acid analysis using urine filter paper samples to screen for metabolic vitamin B(12) deficiency in older adults","Boutin M, Presse N, Allard D, Martineau T, Gaudreau P, Auray-Blais C.","Bioanalysis. 2022 May	15	Method
35491956	35491956,"Metformin-induced vitamin B12 deficiency can cause or worsen distal symmetrical, autonomic and cardiac neuropathy in the patient with diabetes","Bell DSH.","Diabetes Obes Metab. 2022 Aug	16	review
35458234	35458234,"Pernicious Anemia: The Hematological Presentation of a Multifaceted Disorder Caused by Cobalamin Deficiency","Esposito G, Dottori L, Pivetta G, Ligato I, Dilaghi E, Lahner E.","Nutrients. 2022 Apr 17	17	review
35443537	35443537,"Pancytopenia: Etiology and it's Variables","N RS, Sharma R, Madhulata, Sharma R.","J Assoc Physicians India. 2022 Apr	18	observational, no evidence for causality
35406106	35406106,"Influences of Vitamin B(12) Supplementation on Cognition and Homocysteine in Patients with Vitamin B(12) Deficiency and Cognitive Impairment","Ueno A, Hamano T, Enomoto S, Shirafuji N, Nagata M, Kimura H, Ikawa M, Yamamura O, Yamanaka D, Ito T, Kimura Y, Kuriyama M, Nakamoto Y.","Nutrients. 2022 Apr 2	19	open label, single arm
35337628	35337628,"Vitamin B12 deficiency","Green R, Miller JW.","Vitam Horm. 2022	20	review
35307992	35307992,"Analysis of clinical characteristics and prognostic factors in 110 patients with nitrous oxide abuse","Yu M, Qiao Y, Li W, Fang X, Gao H, Zheng D, Ma Y.","Brain Behav. 2022 Apr	21	Neurology, Nitrous oxide
35253567	35253567,"Nitrous oxide abuse induced subacute combined degeneration despite patient initiated B12 supplementation","Temple C, Horowitz BZ.","Clin Toxicol (Phila). 2022 Jul	22	Neurology, Nitrous oxide
35120104	35120104,"Evaluation of the response to vitamin B12 supplementation in patients with atrophy in sleeve gastrectomy materials","Adalı Y, Binnetoğlu K.","Cir Cir. 2022	23	B12 treatment in pts with atrophy
34859834	34859834,"The Factors Associated with Carpal Tunnel Syndrome Severity","Tonga F, Bahadir S.","Turk Neurosurg. 2022	24	associations with carpal tunnel syndrome
34855899	34855899,"Association of air pollution and homocysteine with global DNA methylation: A population-based study from North India","Yadav S, Longkumer I, Garg PR, Joshi S, Rajkumari S, Devi NK, Saraswathy KN.","PLoS One. 2021 Dec 2	25	not relevant
34775689	34775689,"Clinical epidemiological characteristics of nitrous oxide abusers: A single-center experience in a hospital in China","Li Y, Dong J, Xu R, Feng F, Kan W, Ding H, Wang X, Chen Y, Wang X, Zhu S, Dong R.","Brain Behav. 2021 Dec	26	Neurology, Nitrous oxide
34758196	34758196,"Nitrous oxide-related neurological disorders: Clinical, laboratory, neuroimaging, and electrophysiological findings","Jiang J, Shang X, Wang X, Chen H, Li W, Wang Y, Xu J.","Brain Behav. 2021 Dec	27	Neurology, Nitrous oxide
34749301	34749301,"Vitamin B12 and gut-brain homeostasis in the pathophysiology of ischemic stroke","Roth W, Mohamadzadeh M.","EBioMedicine. 2021 Nov	28	review
34693890	34693890,"Clinical relevance of testing for metabolic vitamin B12 deficiency in patients with polyneuropathy","Warendorf JK, van Doormaal PTC, Vrancken AFJE, Verhoeven-Duif NM, van Eijk RPA, van den Berg LH, Notermans NC.","Nutr Neurosci. 2022 Dec	29	Neuropathy and B12 treatment
34662867	34662867,"Nutrition, Inflammation, and the Gut Microbiota among Outpatients with Active Tuberculosis Disease in India","Huey SL, Yu EA, Finkelstein JL, Glesby MJ, Bonam W, Russell DG, Mehta S.","Am J Trop Med Hyg. 2021 Oct 18	30	observational tuberculosis
34615606	34615606,"Hematinic deficiency in patients with heart failure with reduced ejection fraction (HFrEF)","Aggarwal P, Sinha SK, Khanra D, Razi M, Nath RK, Shrivastava A.","Ann Cardiol Angeiol (Paris). 2022 Jun	31	observational heart failure
34427020	34427020,"Nitrous oxide-induced myeloneuropathy","Swart G, Blair C, Lu Z, Yogendran S, Offord J, Sutherland E, Barnes S, Palavra N, Cremer P, Bolitho S, Michael Halmagyi G.","Eur J Neurol. 2021 Dec	32	Myeloneuropathy and Nitrous oxide
34245346	34245346,"A rise in cases of nitrous oxide abuse: neurological complications and biological findings","Einsiedler M, Voulleminot P, Demuth S, Kalaaji P, Bogdan T, Gauer L, Reschwein C, Nadaj-Pakleza A, de Sèze J, Kremer L, Schroder I, Bigaut K.","J Neurol. 2022 Feb	33	Neurology, Nitrous oxide
34219769	34219769,"Diseases associated with hypercobalaminemia in dogs in United Kingdom: A retrospective study of 47 dogs","Da Riz F, Higgs P, Ruiz G.","Can Vet J. 2021 Jun	34	animals
34134041	34134041,"Hyperhomocysteinemia and low vitamin B12 are associated with the risk of early pregnancy loss: A clinical study and meta-analyses","Bala R, Verma R, Verma P, Singh V, Yadav N, Rajender S, Agrawal NR, Singh K.","Nutr Res. 2021 Jul	35	risk group: pregnant women- Metaanalysis
34035493	34035493,"Patients with unexplained neurological symptoms and signs should be screened for vitamin B12 deficiency regardless of haemoglobin levels","Maghsoudlou P, Varlamova J, Pandit J.","Eye (Lond). 2022 May	36	unexplained neurological symptoms, normal Hb
34015185	34015185,"Pernicious anemia: Pathophysiology and diagnostic difficulties","Htut TW, Thein KZ, Oo TH.","J Evid Based Med. 2021 May	37	review
33780172	33780172,"Prognostic indicators of subacute combined degeneration from B12 deficiency: A systematic review","Jhunjhnuwala D, Tanglay O, Briggs NE, Yuen MTY, Huynh W.","PM R. 2022 Apr	38	SCAD - Sys. Review
33657459	33657459,"COVID-19: A methyl-group assault?","McCaddon A, Regland B.","Med Hypotheses. 2021 Apr	39	review
33622624	33622624,"Vitamin B12 supplementation orally and intramuscularly in people with obesity undergoing gastric bypass","Ramos RJ, Mottin CC, Alves LB, Mulazzani CM, Padoin AV.","Obes Res Clin Pract. 2021 Mar-Apr	40	treatment in gastric bypass
33601391	33601391,"Enteral Vitamin B12 Supplementation Is Effective for Improving Anemia in Patients Who Underwent Total Gastrectomy","Namikawa T, Maeda M, Yokota K, Iwabu J, Munekage M, Uemura S, Maeda H, Kitagawa H, Kobayashi M, Hanazaki K.","Oncology. 2021	41	treatment oral vs. i.m
33548097	33548097,"Is There a Carcinogenic Risk Attached to Vitamin B(12) Deficient Diets and What Should We Do About It? Reviewing the Facts","Loedin AK, Speijer D.","Mol Nutr Food Res. 2021 Mar	42	review
33522740	33522740,"Metabolic and Toxic Myelopathies","Parks NE.","Continuum (Minneap Minn). 2021 Feb 1	43	review
33459639	33459639,"Plasma Vitamin B12 Levels, High-Dose Vitamin B12 Treatment, and Risk of Dementia","Arendt JFH, Horváth-Puhó E, Sørensen HT, Nexø E, Pedersen L, Ording AG, Henderson VW.","J Alzheimers Dis. 2021	44	associations: low B12 and dementia; B12 treatment and and dementia
33257090	33257090,"COVID-19's toll on the elderly and those with diabetes mellitus - Is vitamin B12 deficiency an accomplice?","Wee AKH.","Med Hypotheses. 2021 Jan	45	review
33174766	33174766,"SARS-CoV-2: influence of phosphate and magnesium, moderated by vitamin D, on energy (ATP) metabolism and on severity of COVID-19","van Kempen TATG, Deixler E.","Am J Physiol Endocrinol Metab. 2021 Jan 1	46	review
33156552	33156552,"Test utilization for the diagnosis of vitamin B12 and folate deficiency in local clinics in Korea","Choi R, Oh Y, Park MJ, Kim S, Kim Y, Lee SG, Lee EH.","J Clin Lab Anal. 2020 Nov	47	purely biomarkers
33126294	33126294,"Lingual Linear Lesions: A Clinical Sign Strongly Suggestive of Severe Vitamin B(12) Deficiency","Bao ZX, Yang XW, Fang DD.","Nutr Clin Pract. 2021 Oct	48	oral lesion, B12 treatment
33120734	33120734,"Association between frailty and vitamin B12 in the older Korean population","Soh Y, Won CW.","Medicine (Baltimore). 2020 Oct 23	49	risk group: elderly
330993	33099331,"Correlation between anemia and clinical severity in subacute combined degeneration patients","Bi Z, Cao J, Shang K, Su Z, Xu S, Liu C.","J Clin Neurosci. 2020 Oct	50	SCAD and anemia
33073953	33073953,"Diagnostic Characteristics of 3-Parameter and 2-Parameter Equations for the Calculation of a Combined Indicator of Vitamin B12 Status to Predict Cobalamin Deficiency in a Large Mixed Patient Population","Campos AJ, Risch L, Nydegger U, Wiesner J, Dyck MVV, Seger C, Stanga Z, Renz H, Risch M.","Clin Lab. 2020 Oct 1	51	purely biomarkers
33002395	33002395,"Oral Manifestations of Nutritional Deficiencies: Single Centre Analysis","Radochová V, Slezák R, Radocha J.","Acta Medica (Hradec Kralove). 2020	52	oral lesion, associations
32947426	32947426,"Vitamin B6 Deficiency in Patients With Parkinson Disease Treated With Levodopa/Carbidopa","Rojo-Sebastián A, González-Robles C, García de Yébenes J.","Clin Neuropharmacol. 2020 Sep/Oct	53	not relevant
32945532	32945532,"Clinical features of vitamin B12 deficiency mimicking thrombotic microangiopathy","Koshy AG, Freed JA.","Br J Haematol. 2020 Dec	54	hematologic manifestations of B12 deficiency; observational
32819927	32819927,"Oral versus intramuscular administration of vitamin B12 for vitamin B12 deficiency in primary care: a pragmatic, randomised, non-inferiority clinical trial (OB12)","Sanz-Cuesta T, Escortell-Mayor E, Cura-Gonzalez I, Martin-Fernandez J, Riesgo-Fuertes R, Garrido-Elustondo S, Mariño-Suárez JE, Álvarez-Villalba M, Gómez-Gascón T, González-García I, González-Escobar P, Vargas-Machuca Cabañe…	55	treatment oral vs. i.m
32805133	32805133,"Three-Year Outcomes of Bariatric Surgery in Patients With Obesity and Hypertension : A Randomized Clinical Trial","Schiavon CA, Bhatt DL, Ikeoka D, Santucci EV, Santos RN, Damiani LP, Oliveira JD, Machado RHV, Halpern H, Monteiro FLJ, Noujaim PM, Cohen RV, de Souza MG, Amodeo C, Bortolotto LA, Berwanger O, Cavalcanti AB, Drager LF.","Ann Intern Med. 2020 Nov 3	56	bariatric surgery, low B12 (low relevance)
32798344	32798344,"Assessment of Reference Range of Serum Homocysteine from the Post-therapy Values of Cobalamin and Folate Deficiency Patients","Chandrasekhar C, Kiranmayi VS, Pasupuleti SK, Sarma KV, Sarma PV.","J Assoc Physicians India. 2020 Sep	57	treatment, reversible clinical symptoms
32785129	32785129,"Low Serum Vitamin B12 Levels Are Associated with Adverse Lipid Profiles in Apparently Healthy Young Saudi Women","Al-Musharaf S, Aljuraiban GS, Danish Hussain S, Alnaami AM, Saravanan P, Al-Daghri N.","Nutrients. 2020 Aug 10	58	associations with plasma lipids
32648110	32648110,"Ileocecal valve syndrome and vitamin b12 deficiency after surgery: a multicentric prospective study","Germani P, Zucca A, Giudici F, Terranova S, Troian M, Samardzic N, Greco M, Janez J, Gasparini C, Cagnazzo E, Vignali A, Giannone Codiglione F, Armellini A, Fumagalli UR, Rosati R, Piccinni G, Megevand J, Tomazic A, Corcione F, Palmisano S, de Manzini N.","Updates Surg. 2021 Apr	59	colon resection and follow up of B12 levels after 3 and 6 months (very short folow up, weak evidence)
32639203	32639203,"Increased monocyte to HDL cholesterol ratio in vitamin B12 deficiency: Is it related to cardiometabolic risk?","Kayhan S, Kirnap NG, Tastemur M.","Int J Vitam Nutr Res. 2021 Sep	60	observational cardiometabolic risk
32448786	32448786,"Association of vitamin B(12) deficiency in people with type 2 diabetes on metformin and without metformin: a multicenter study, Karachi, Pakistan","Miyan Z, Waris N	61	Risk group: metformin use
32444241	32444241,"Medium term post-bariatric surgery deficit of vitamin B12 is predicted by deficit at time of surgery","Antoine D, Li Z, Quilliot D, Sirveaux MA, Meyre D, Mangeon A, Brunaud L, Guéant JL, Guéant-Rodriguez RM.","Clin Nutr. 2021 Jan	62	Risk group: postbariatric surgery
32297187	32297187,"No association between subnormal serum vitamin B12 and anemia in older nursing home patients","Abrahamsen JF, Monsen AB, Ranhoff AH, Nilsen RM, Engtrø E, Rekdal M, Kruger K.","Eur Geriatr Med. 2020 Apr	63	Risk group: elderly and anemia
32243408	32243408,"Is serum vitamin B12 decrease a necessity for the diagnosis of subacute combined degeneration?: A meta-analysis","Cao J, Xu S, Liu C.","Medicine (Baltimore). 2020 Apr	64	SCAD, admission B12 and anemia
32089757	32089757,"Diagnostic Accuracy of Holotranscobalamin, Vitamin B12, Methylmalonic Acid, and Homocysteine in Detecting B12 Deficiency in a Large, Mixed Patient Population","Jarquin Campos A, Risch L, Nydegger U, Wiesner J, Vazquez Van Dyck M, Renz H, Stanga Z, Risch M.","Dis Markers. 2020 Feb 7	65	purely biomarkers
32053765	32053765,"Diagnostic difficulties in pernicious anemia","Oo TH.","Discov Med. 2019 Nov-Dec	66	review
31902683	31902683,"Vitamin B12 deficiency and metabolism-mediated thrombotic microangiopathy (MM-TMA)","Sabry W, Elemary M, Burnouf T, Seghatchian J, Goubran H.","Transfus Apher Sci. 2020 Feb	67	review
31837157	31837157,"Nutritional neuropathies","Gwathmey KG, Grogan J.","Muscle Nerve. 2020 Jul	68	review
31740360	31740360,"Methylmalonic acid and vitamin B12 in patients with heart failure","Polytarchou K, Dimitroglou Y, Varvarousis D, Christodoulis N, Psachoulia C, Pantziou C, Mourouzis I, Pantos C, Manolis AS.","Hellenic J Cardiol. 2020 Sep-Oct	69	observational B12 markers and heart failure
31714882	31714882,"High frequency of anti-parietal cell antibody (APCA) and intrinsic factor blocking antibody (IFBA) in individuals with severe vitamin B12 deficiency - an observational study in primary care patients","Salinas M, Flores E, López-Garrigós M, Leiva-Salinas C.","Clin Chem Lab Med. 2020 Feb 25	70	Gastric; causes of B12 malabsorption
31697851	31697851,"Noninvasive prenatal diagnosis of cobalamin C (cblC) deficiency through target region sequencing of cell-free DNA in maternal plasma","Han L, Chen C, Guo F, Ye J, Peng Z, Qiu W, Wang Y, Li W, Zhang H, Liang L, Wang Y, Wang H, Ji X, Sun J, Gu X.","Prenat Diagn. 2020 Feb	71	not relevant
31680206	31680206,"Vitamin D and hematinic deficiencies in patients with recurrent aphthous stomatitis","Al-Amad SH, Hasan H.","Clin Oral Investig. 2020 Jul	72	not relevant
31667698	31667698,"The doctor who stared at schistocytes: an intriguing case of suspected thrombotic microangiopathic anemia","Pieralli F, Milia A, Fruttuoso S, Bandini G, Mercatelli P, Nozzoli C, Luise F, Mancini A, Sammicheli L, Moggi Pignone A.","Intern Emerg Med. 2021 Mar	73	case report
31661309	31661309,"Autoimmune Gastritis","Hall SN, Appelman HD.","Arch Pathol Lab Med. 2019 Nov	74	review
31651584	31651584,"Discovering metformin-induced vitamin B12 deficiency in patients with type 2 diabetes in primary care","Herbert L, Ribar A, Mitchell S, Phillips C.","J Am Assoc Nurse Pract. 2019 Oct 20	75	not relevant
31625167	31625167,"Vitamin B(12) supplementation futile for preventing demyelination in ongoing nitrous oxide misuse","Blair C, Tremonti C, Edwards L, Haber PS, Halmagyi GM.","Med J Aust. 2019 Nov	76	Nitrous oxide and B12 treatment (potentially relevant)
31603875	31603875,"Vitamin B12 status and peripheral neuropathy in patients with type 2 diabetes mellitus","Khalaf KM, Khudhair MS, Ashor AW.","J Pak Med Assoc. 2019 Aug	77	Neuropathy, diabetes and metformin
31600243	31600243,"A physiological dose of oral vitamin B-12 improves hematological, biochemical-metabolic indices and peripheral nerve function in B-12 deficient Indian adolescent women","Yajnik CS, Behere RV, Bhat DS, Memane N, Raut D, Ladkat R, Yajnik PC, Kumaran K, Fall CHD.","PLoS One. 2019 Oct 10	78	B12 in the range of dietary intake- pre-post study
31590426	31590426,"Cyano-B12 or Whey Powder with Endogenous Hydroxo-B12 for Supplementation in B12 Deficient Lactovegetarians","Naik S, Mahalle N, Greibe E, Ostenfeld MS, Heegaard CW, Nexo E, Fedosov SN.","Nutrients. 2019 Oct 6	79	B12 in the range of dietary intake
31438918	31438918,"A meta-analysis of comparison of proximal gastrectomy with double-tract reconstruction and total gastrectomy for proximal early gastric cancer","Li S, Gu L, Shen Z, Mao D, Khadaroo PA, Su H.","BMC Surg. 2019 Aug 22	80	not relevant (mostly on practiciong B12 suppl.)
31177227	31177227,"Association Between Cognitive Impairment and Vitamin B12, Folate, and Homocysteine Status in Elderly Adults: A Retrospective Study","Baroni L, Bonetto C, Rizzo G, Bertola C, Caberlotto L, Bazzerla G.","J Alzheimers Dis. 2019	81	Retrospective associations mostly with folate and Hcy and dementia
31119757	31119757,"Risk of depression in pregnant women with low-normal serum Vitamin B12","Peppard L, Oh KM, Gallo S, Milligan R.","Res Nurs Health. 2019 Aug	82	observational study association, depression and B12 in pregnant women
31067706	31067706,"Monitoring Vitamin B(12) in Women Treated with Metformin for Primary Prevention of Breast Cancer and Age-Related Chronic Diseases","Mastroianni A, Ciniselli CM, Panella R, Macciotta A, Cavalleri A, Venturelli E, Taverna F, Mazzocchi A, Bruno E, Muti P, Berrino F, Verderio P, Morelli D, Pasanisi P.","Nutrients. 2019 May 7	83	Risk group: metformin use
31017569	31017569,"Addition of Vitamin B Complex to Prime Solution in Cobalamin-Deficient Patients to Prevent Postoperative Delirium","Demirdas E, Atilgan K.","Heart Surg Forum. 2019 Feb 25	84	not relevant
30927123	30927123,"Nutritional safety of oncometabolic surgery for early gastric cancer patients: a prospective single-arm pilot study using a historical control group for comparison","Park YS, Park DJ, Kim KH, Park DJ, Lee Y, Park KB, Min SH, Ahn SH, Kim HH.","Surg Endosc. 2020 Jan	85	not relevant
30919610	30919610,"Vitamins B12 and D deficiencies and macro- and microelement disturbances among diabetic elderly patients","Dziegielewska-Gesiak S, Fatyga E, Kasiarz G, Wilczynski T, Muc-Wierzgon M, Kokot T.","J Biol Regul Homeost Agents. 2019 Mar-Apr,	86	Risk group: elderly with diabetes
30887907	30887907,"Characteristics of patients with vitamin B12-responsive neuropathy: a case series with systematic repeated electrophysiological assessment","Franques J, Chiche L, De Paula AM, Grapperon AM, Attarian S, Pouget J, Mathis S.","Neurol Res. 2019 Jun	87	Small study, neuropathy, treatment, no control
30796433	30796433,"State of the art review: oral and nasal vitamin B12 therapy in the elderly","Andrès E, Zulfiqar AA, Vogel T.","QJM. 2020 Jan 1	88	review
30717112	30717112,"Comparative Bioavailability of Synthetic B12 and Dietary Vitamin B12 Present in Cow and Buffalo Milk: A Prospective Study in Lactovegetarian Indians","Mahalle N, Bhide V, Greibe E, Heegaard CW, Nexo E, Fedosov SN, Naik S.","Nutrients. 2019 Feb 1	89	intake in the range of diet
30680547	30680547,"Vitamin B12-fortified toothpaste improves vitamin status in elderly people: a randomized, double-blind, placebo-controlled study","Zant A, Awwad HM, Geisel J, Keller M, Obeid R.","Aging Clin Exp Res. 2019 Dec	90	toothpaste (B12 in the range of food supplements)
30670531	30670531,"Vitamin B ((12)) deficiency and hyperhomocysteinaemia in outpatients with stroke or transient ischaemic attack: a cohort study at an academic medical centre","Ahmed S, Bogiatzi C, Hackam DG, Rutledge AC, Sposato LA, Khaw A, Mandzia J, Azarpazhoo MR, Hachinski V, Spence JD.","BMJ Open. 2019 Jan 21	91	Risk group: elderly with stroke
30611595	30611595,"Recreational nitrous oxide abuse related subacute combined degeneration of the spinal cord in adolescents - A case series and literature review","Lan SY, Kuo CY, Chou CC, Kong SS, Hung PC, Tsai HY, Chen YC, Lin JJ, Chou IJ, Lin KL	92	Nitrous oxide and B12 treatment (symptoms reversibility)
30606434	30606434,"Serum cobalamin and folate as prognostic factors in canine exocrine pancreatic insufficiency: An observational cohort study of 299 dogs","Soetart N, Rochel D, Drut A, Jaillardon L.","Vet J. 2019 Jan	93	animals
30577611	30577611,"The Effect of Whey and Soy Protein Isolates on Cognitive Function in Older Australians with Low Vitamin B(12): A Randomised Controlled Crossover Trial","Zajac IT, Herreen D, Bastiaans K, Dhillon VS, Fenech M.","Nutrients. 2018 Dec 21	94	dietary intervention- not relevant
30561424	30561424,"Clinical manifestations of chronic atrophic gastritis","Rodriguez-Castro KI, Franceschi M, Noto A, Miraglia C, Nouvenne A, Leandro G, Meschi T, De' Angelis GL, Di Mario F.","Acta Biomed. 2018 Dec 17	95	review
30369425	30369425,"Safety of Same-Day Vitamin B12 Supplementation in Patients Receiving Pemetrexed for the Treatment of Non-Small-Cell Lung Cancer or Pleural Mesothelioma: A Retrospective Analysis","Schlei Z, Tan W, Faber MG, Chen H, Meagher A, Dy GK.","Clin Lung Cancer. 2018 Nov	96	both intervention arms are treated with B12- makes no sense for this project
30317438	30317438,"Prevalence of vitamin B(12) deficiency in South Indians with different grades of glucose tolerance","Jayashri R, Venkatesan U, Rohan M, Gokulakrishnan K, Shanthi Rani CS, Deepa M, Anjana RM, Mohan V, Pradeepa R.","Acta Diabetol. 2018 Dec	97	Risk group: diabetes and pre-diabetes
30231804	30231804,"Anemia following Roux-en-Y gastric bypass for morbid obesity	98	Risk group-gastric bypass: supplemented with multivitamins incl. B12- no deficincy developed within 5 years follow up
30144777	30144777,"Subacute combined degeneration of the spinal cord following nitrous oxide anesthesia: A systematic review of cases","Patel KK, Mejia Munne JC, Gunness VRN, Hersey D, Alshafai N, Sciubba D, Nasser R, Gimbel D, Cheng J, Nouri A.","Clin Neurol Neurosurg. 2018 Oct	99	SCAD and nitrous oxide- systematic review of cases
30107753	30107753,"Clinical and imaging characteristics of subacute combined degeneration complicated with white matter lesions in the brain: a report of five cases","Chen H, Li H, Li Y, Jing J, Raza HK, Zhang Z, Dong L, Ye X, Hua F, Cui G.","Somatosens Mot Res. 2018 Jun	100	B12 not reported
30071147	30071147,"Proton Pump Inhibitors: Risks and Rewards and Emerging Consequences to the Gut Microbiome","Singh A, Cresci GA, Kirby DF.","Nutr Clin Pract. 2018 Oct	101	review
30032223	30032223,"Proton Pump Inhibitors, H2-Receptor Antagonists, Metformin, and Vitamin B-12 Deficiency: Clinical Implications","Miller JW.","Adv Nutr. 2018 Jul 1	102	review
30006950	30006950,"Mean cell volume of reticulocyte-A new parameter for diagnosing sub-clinical cobalamin deficiency in blood donors","Khan SM, Agha MA.","Int J Lab Hematol. 2019 Feb	103	letter to the editor
29903686	29903686,"Do specialized bariatric multivitamins lower deficiencies after RYGB?","Schijns W, Schuurman LT, Melse-Boonstra A, van Laarhoven CJHM, Berends FJ, Aarts EO.","Surg Obes Relat Dis. 2018 Jul	104	Risk group: bariatric surgery
29874929	29874929,"Improved testing for vitamin B(12) deficiency: correcting MMA for eGFR reduces the number of patients classified as vitamin B(12) deficient","van Loon SL, Wilbik AM, Kaymak U, van den Heuvel ER, Scharnhorst V, Boer AK.","Ann Clin Biochem. 2018 Nov	105	purely biomarkers
29794789	29794789,"The influence of thyroid diseases, diabetes mellitus, primary hyperparathyroidism, vitamin B12 deficiency and other comorbid autoimmune diseases on treatment outcome in patients with rheumatoid arthritis: An exploratory cohort study","Emamifar A, Jensen Hansen IM.","Medicine (Baltimore). 2018 May	106	associations with rheumatoid artritis- no evidence for causality
29741251	29741251,"Vitamin B12 deficiency and clinical laboratory: Lessons revisited and clarified in seven questions","Salinas M, Flores E, López-Garrigós M, Leiva-Salinas C.","Int J Lab Hematol. 2018 May	107	review
29698962	29698962,"Subacute Combined Degeneration: A Retrospective Study of 68 Cases with Short-Term Follow-Up","Cao J, Su ZY, Xu SB, Liu CC.","Eur Neurol. 2018	108	SCAD and effect of B12 treatment
29669023	29669023,"The Relevance of Vitamin and Iron Deficiency in Patients with Inflammatory Bowel Diseases in Patients of the Swiss IBD Cohort","Madanchi M, Fagagnini S, Fournier N, Biedermann L, Zeitz J, Battegay E, Zimmerli L, Vavricka SR, Rogler G, Scharl M	109	Risk group inflammatory bowel diseases (Crohn, ulcerative colitis)
29663261	29663261,"Evaluation of diffusion tensor imaging changes and neurocognitive effects of asymptomatic vitamin B12 deficiency","Tak AZA, Dayan E, Bulut HT.","Acta Neurol Belg. 2018 Jun	110	Neurocognition and latent B12 deficiency
29614799	29614799,"Folate and B12 Levels Correlate with Histological Severity in NASH Patients","Mahamid M, Mahroum N, Bragazzi NL, Shalaata K, Yavne Y, Adawi M, Amital H, Watad A.","Nutrients. 2018 Apr 2	111	Risk group: NASH/fatty liver
29613894	29613894,"Metabolic and Toxic Myelopathies","Schwendimann RN.","Continuum (Minneap Minn). 2018 Apr	112	review
29599609	29599609,"Correlation between serum vitamin B12 level and peripheral neuropathy in atrophic gastritis","Yang GT, Zhao HY, Kong Y, Sun NN, Dong AQ.","World J Gastroenterol. 2018 Mar 28	113	Risk group: B12 in atrophic gastritis and neuropathy
29579413	29579413,"The unusual nutritional and toxin-related underproduction anemias: approaching the riddle beyond iron, cobalamin, and folate","Rojas-Hernandez CM, Oo TH.","Discov Med. 2018 Feb	114	review
29543316	29543316,"Oral vitamin B(12) versus intramuscular vitamin B(12) for vitamin B(12) deficiency","Wang H, Li L, Qin LL, Song Y, Vidal-Alaball J, Liu TH.","Cochrane Database Syst Rev. 2018 Mar 15	115	treatment oral vs. i.m
29499976	29499976,"Effect of two different sublingual dosages of vitamin B(12) on cobalamin nutritional status in vegans and vegetarians with a marginal deficiency: A randomized controlled trial","Del Bo' C, Riso P, Gardana C, Brusamolino A, Battezzati A, Ciappellano S.","Clin Nutr. 2019 Apr	116	treatment RCT high dose B12 in vegans
29496696	29496696,"Do the benefits of folic acid fortification outweigh the risk of masking vitamin B(12) deficiency?","Mills JL, Molloy AM, Reynolds EH.","BMJ. 2018 Mar 1	117	review
29446340	29446340,"Identification of vitamin B12 deficiency in vegetarian Indians","Naik S, Mahalle N, Bhide V.","Br J Nutr. 2018 Mar	118	Risk group vegetarians
29352218	29352218,"Nutritional deficiencies and bone metabolism after endobarrier in obese type 2 patients with diabetes","Vilarrasa N, Fabregat A, Toro S, Gordejuela AG, Casajoana A, Montserrat M, Garrido P, López-Urdiales R, Virgili N, Planas-Vilaseca A, Simó-Servat A, Pujol J.","Eur J Clin Nutr. 2018 Oct	119	Risk group: obese type 2 diabetes
29318504	29318504,"Oral Vitamin B(12) Supplementation After Roux-en-Y Gastric Bypass: a Systematic Review","Mahawar KK, Reid A, Graham Y, Callejas-Diaz L, Parmar C, Carr WR, Jennings N, Singhal R, Small PK.","Obes Surg. 2018 Jul	120	treatment oral B12 after gastric bypass- syst review
29305340	29305340,"Evidence From Web-Based Dietary Search Patterns to the Role of B12 Deficiency in Non-Specific Chronic Pain: A Large-Scale Observational Study","Giat E, Yom-Tov E.","J Med Internet Res. 2018 Jan 5	121	Observational B12 and pain
29209773	29209773,"Effect of 8-week oral supplementation with 3-µg cyano-B12 or hydroxo-B12 in a vitamin B12-deficient population","Greibe E, Mahalle N, Bhide V, Fedosov S, Heegaard CW, Naik S, Nexo E.","Eur J Nutr. 2019 Feb	122	in the range of dietary intake
29190137	29190137,"HIGH-RISK GASTRIC PATHOLOGY AND PREVALENT AUTOIMMUNE DISEASES IN PATIENTS WITH PERNICIOUS ANEMIA","Hughes JW, Muegge BD, Tobin GS, Litvin M, Sun L, Saenz JB, Gyawali CP, McGill JB.","Endocr Pract. 2017 Nov	123	Identify and diagnose causes of B12 deficiency
29052170	29052170,"The histopathological evaluation of small fiber neuropathy in patients with vitamin B12 deficiency","Güneş HN, Bekircan-Kurt CE, Tan E, Erdem-Özdamar S.","Acta Neurol Belg. 2018 Sep	124	Neuropathy in patients with B12 deficiency- potentially relevant
28972879	28972879,"Challenging clinical presentations of pernicious anemia","Oo TH, Rojas-Hernandez CM.","Discov Med. 2017 Sep	125	review
28925645	28925645,"Vitamin B12 Deficiency: Recognition and Management","Langan RC, Goodbred AJ.","Am Fam Physician. 2017 Sep 15	126	review
28917233	28917233,"High prevalence of vitamin B-12 insufficiency in patients with Crohn's disease","Ao M, Tsuji H, Shide K, Kosaka Y, Noda A, Inagaki N, Nakase H, Tanaka K.","Asia Pac J Clin Nutr. 2017	127	At risk group: Crohn disease
28882470	28882470,"An observational study of vitamin b12 levels and peripheral neuropathy profile in patients of diabetes mellitus on metformin therapy","Gupta K, Jain A, Rohatgi A.","Diabetes Metab Syndr. 2018 Jan-Mar	128	At risk group: pts with diabetes using metformin
28778298	28778298,"The Lived Experience of Anemia Without a Cause","O'Malley P.","Crit Care Nurs Clin North Am. 2017 Sep	129	review
28757000	28757000,"Characteristics of Vitamin B12 Deficiency in Patients With Plasma Cell Disorders","Braschi C, Doucette J, Chari A.","Clin Lymphoma Myeloma Leuk. 2017 Dec	130	associations, no evidence for causality
28549839	28549839,"Vitamin B12 deficiency might be related to sarcopenia in older adults","Ates Bulut E, Soysal P, Aydin AE, Dokuzlar O, Kocyigit SE, Isik AT.","Exp Gerontol. 2017 Sep	131	Risk group: Elderly sarcopenia
28507011	28507011,"Influence of Diet in Multiple Sclerosis: A Systematic Review","Bagur MJ, Murcia MA, Jiménez-Monreal AM, Tur JA, Bibiloni MM, Alonso GL, Martínez-Tomé M.","Adv Nutr. 2017 May 15	132	Association B12 and multiple sclerosis
28461497	28461497,"Folate rescues vitamin B(12) depletion-induced inhibition of nuclear thymidylate biosynthesis and genome instability","Palmer AM, Kamynina E, Field MS, Stover PJ.","Proc Natl Acad Sci U S A. 2017 May 16	133	not relevant
28436021	28436021,"Burning mouth syndrome: results of screening tests for vitamin and mineral deficiencies, thyroid hormone, and glucose levels-experience at Mayo Clinic over a decade","Morr Verenzuela CS, Davis MDP, Bruce AJ, Torgerson RR.","Int J Dermatol. 2017 Sep	134	burning mouth, association study
28406440	28406440,"Associations between Folate and Vitamin B12 Levels and Inflammatory Bowel Disease: A Meta-Analysis","Pan Y, Liu Y, Guo H, Jabir MS, Liu X, Cui W, Li D.","Nutrients. 2017 Apr 13	135	Risk group inflammatory bowel diseases (Crohn, ulcerative colitis)
28360040	28360040,"Vitamin B(12) deficiency from the perspective of a practicing hematologist","Green R.","Blood. 2017 May 11	136	associations with diseases- no causal inference
28299439	28299439,"Vitamin B12 deficiency evaluation and treatment in severe dry eye disease with neuropathic ocular pain","Ozen S, Ozer MA, Akdemir MO.","Graefes Arch Clin Exp Ophthalmol. 2017 Jun	137	associations with eye diseases/no causal inference
28283394	28283394,"The study of association of Vitamin B(12) deficiency in type 2 diabetes mellitus with and without diabetic nephropathy in North Indian Population","Bherwani S, Ahirwar AK, Saumya AS, Sandhya AS, Prajapat B, Patel S, Jibhkate SB, Singh R, Ghotekar LH.","Diabetes Metab Syndr. 2017 Nov	138	Risk group: diabetes
28225050	28225050,"Impact of baseline vitamin B12 status on the effect of vitamin B12 supplementation on neurologic function in older people: secondary analysis of data from the OPEN randomised controlled trial","Miles LM, Allen E, Clarke R, Mills K, Uauy R, Dangour AD.","Eur J Clin Nutr. 2017 Oct	139	non-controlled suppl. Study with B12 on neurologic functions
28182265	28182265,"Long-term Metformin Therapy and Monitoring for Vitamin B12 Deficiency Among Older Veterans","Kancherla V, Elliott JL Jr, Patel BB, Holland NW, Johnson TM 2nd, Khakharia A, Phillips LS, Oakley GP Jr, Vaughan CP.","J Am Geriatr Soc. 2017 May	140	Risk group: metformin use
28164751	28164751,"Pernicious Anemia: Fundamental and Practical Aspects in Diagnosis","Tun AM, Thein KZ, Myint ZW, Oo TH.","Cardiovasc Hematol Agents Med Chem. 2017 Nov 8	141	review
28076676	28076676,"Use of Metformin for Cardiometabolic Risks in Psychiatric Practice: Need-to-Know Safety Issues","Andrade C.","J Clin Psychiatry. 2016 Nov	142	review
28073728	28073728,"Biermer anemia: Hematologic characteristics of 66 patients in a Clinical Hematology Unit at Senegal","Seynabou F, Fatou Samba Diago N, Oulimata Diop D, Abibatou Fall S, Nafissatou D.","Med Sante Trop. 2016 Nov 1	143	review
28052884	28052884,"Vitamin B-12-fortified toothpaste improves vitamin status in vegans: a 12-wk randomized placebo-controlled study","Siebert AK, Obeid R, Weder S, Awwad HM, Sputtek A, Geisel J, Keller M.","Am J Clin Nutr. 2017 Mar	144	toothpaste (B12 in the range of food supplements)
27981743	27981743,"Whey protein isolate improves vitamin B(12) and folate status in elderly Australians with subclinical deficiency of vitamin B(12)","Dhillon VS, Zabaras D, Almond T, Cavuoto P, James-Martin G, Fenech M.","Mol Nutr Food Res. 2017 May	145	dietary intervention
27874212	27874212,"Dorsal column myelopathy after intrathecal chemotherapy for leukemia","Pinnix CC, Chi L, Jabbour EJ, Milgrom SA, Smith GL, Daver N, Garg N, Cykowski MD, Fuller G, Cachia D, Kamiya-Matsuoka C, Woodman K, Dinardo C, Jain N, Kadia TM, Pemmaraju N, Ohanian M, Konopleva M, Kantarjian HM, Dabaja BS.","Am J Hematol. 2017 Feb	146	not relevant
27838841	27838841,"Different Supplementation Regimes to Treat Perioperative Vitamin B12 Deficiencies in Bariatric Surgery: a Systematic Review","Smelt HJ, Pouwels S, Smulders JF.","Obes Surg. 2017 Jan	147	Suppl. B12 and bariatric surgery
27806244	27806244,"Metformin and Vitamin B12 Deficiency: Where Do We Stand?","Ahmed MA.","J Pharm Pharm Sci. 2016 Jul-Sep	148	review
27769076	27769076,"The role of dietary supplements in inflammatory bowel disease: a systematic review","Rossi RE, Whyand T, Murray CD, Hamilton MI, Conte D, Caplin ME.","Eur J Gastroenterol Hepatol. 2016 Dec	149	B12 in inflammatory bowel diseases- syst review
27520327	27520327,"Drug-Induced Vitamin B(12) Deficiency: A Focus on Proton Pump Inhibitors and Histamine-2 Antagonists","Linder L, Tamboue C, Clements JN.","J Pharm Pract. 2017 Dec	150	review
275136	27513580,"Multivitamin Use and Serum Vitamin B12 Concentrations in Older-Adult Metformin Users in REGARDS, 2003-2007","Kancherla V, Garn JV, Zakai NA, Williamson RS, Cashion WT, Odewole O, Judd SE, Oakley GP Jr.","PLoS One. 2016 Aug 11	151	Risk group: metformin use
27476707	27476707,"The Indications, Applications, and Risks of Proton Pump Inhibitors","Mössner J.","Dtsch Arztebl Int. 2016 Jul 11	152	review
27391912	27391912,"The relation between vitamin B12 and SYNTAX score","Cerit L, Duygu H, Gulsen K, Kemal H, Tosun O, Ozcem B, Cerit Z, Gunsel A.","Kardiol Pol. 2017	153	association study with coronary artery diseases
273552	27355231,"Sublingual vitamin B12 compared to intramuscular injection in patients with type 2 diabetes treated with metformin: a randomised trial","Parry-Strong A, Langdana F, Haeusler S, Weatherall M, Krebs J.","N Z Med J. 2016 Jun 10	154	Risk group: metformin and B12 treatment- Prevention
27343959	27343959,"The practical evaluation and management of patients with symptoms of a sore burning mouth","Steele JC.","Clin Dermatol. 2016 Jul-Aug	155	review
27301282	27301282,"NutriPhone: a mobile platform for low-cost point-of-care quantification of vitamin B12 concentrations","Lee S, O'Dell D, Hohenstein J, Colt S, Mehta S, Erickson D.","Sci Rep. 2016 Jun 15	156	not relevant
27234214	27234214,"Oral manifestations in vitamin B12 deficiency patients with or without history of gastrectomy","Kim J, Kim MJ, Kho HS.","BMC Oral Health. 2016 May 27	157	Oral manifestations of vitamin b12 deficiency
27169753	27169753,"Laboratory assessment of vitamin B12 status","Harrington DJ.","J Clin Pathol. 2017 Feb	158	review
27146501	27146501,"Comparison Between Different Intramuscular Vitamin B(12) Supplementation Regimes: a Retrospective Matched Cohort Study","Smelt HJ, Pouwels S, Said M, Berghuis KA, Boer AK, Smulders JF.","Obes Surg. 2016 Dec	159	B12 treatment in bariatric surgery
27130885	27130885,"Association between metformin and vitamin B(12) deficiency in patients with type 2 diabetes: A systematic review and meta-analysis","Chapman LE, Darling AL, Brown JE.","Diabetes Metab. 2016 Nov	160	Risk group: metformin & diabetes- systematic review
27026421	27026421,"Vitamin D and vitamin B12 deficiencies are common in patients with midgut carcinoid (SI-NET)","Lind A, Wängberg B, Ellegård L.","Eur J Clin Nutr. 2016 Sep	161	associations with small intestine tumor/no causal inference
27003903	27003903,"Functional vitamin B12 deficiency in advanced malignancy: implications for the management of neuropathy and neuropathic pain","Solomon LR.","Support Care Cancer. 2016 Aug	162	Risk group: advanced malignancy
26965759	26965759,"Conventional MRI for diagnosis of subacute combined degeneration (SCD) of the spinal cord due to vitamin B-12 deficiency","Xiao CP, Ren CP, Cheng JL, Zhang Y, Li Y, Li BB, Fan YZ.","Asia Pac J Clin Nutr. 2016	163	SCAD and therapy with B12
26914484	26914484,"Vitamin B12 screening in metformin-treated diabetics in primary care: were elderly patients less likely to be tested?","Fogelman Y, Kitai E, Blumberg G, Golan-Cohen A, Rapoport M, Carmeli E.","Aging Clin Exp Res. 2017 Apr	164	Risk group: metformin and diabetes
26905910	26905910,"Clinical Manifestations of Isolated Elevated Homocysteine-Induced Peripheral Neuropathy in Adults","Shandal V, Luo JJ.","J Clin Neuromuscul Dis. 2016 Mar	165	associations of mainly homocysteine and neuropathy, no asso. With b12
26900641	26900641,"Long-term Metformin Use and Vitamin B12 Deficiency in the Diabetes Prevention Program Outcomes Study","Aroda VR, Edelstein SL, Goldberg RB, Knowler WC, Marcovina SM, Orchard TJ, Bray GA, Schade DS, Temprosa MG, White NH, Crandall JP	166	Risk group: metformin and diabetes
26892473	26892473,"Vitamin B supplementation for diabetic peripheral neuropathy","Jayabalan B, Low LL.","Singapore Med J. 2016 Feb	167	review
26843105	26843105,"Oxidative Stress Markers in Vitamin B12 Deficiency","Misra UK, Kalita J, Singh SK, Rahi SK.","Mol Neurobiol. 2017 Mar	168	not related
26821156	26821156,"Phase II study of oral vitamin B12 supplementation as an alternative to intramuscular injection for patients with non-small cell lung cancer undergoing pemetrexed therapy","Takagi Y, Hosomi Y, Nagamata M, Watanabe K, Takahashi S, Nakahara Y, Yomota M, Sunami K, Okuma Y, Shimokawa T, Okamura T.","Cancer Chemother Pharmacol. 2016 Mar	169	Treatment with B12 in pts with pemetrexed
26807790	26807790,"Methylmalonic Acid and Homocysteine as Indicators of Vitamin B-12 Deficiency in Cancer","Vashi P, Edwin P, Popiel B, Lammersfeld C, Gupta D.","PLoS One. 2016 Jan 25	170	Risk group: patients with cancer
26630935	26630935,"Correlation of Tc-99 m ethyl cysteinate dimer single-photon emission computed tomography and clinical presentations in patients with low cobalamin status","Tu MC, Lo CP, Chen CY, Huang CF.","BMC Neurol. 2015 Dec 3	171	Clinical manifestations of B12 deficeincy- mostly neuropsychiatric
26624211	26624211,"Examining the Association between Vitamin B12 Deficiency and Dementia in High-Risk Hospitalized Patients","Siswanto O, Smeall K, Watson T, Donnelly-Vanderloo M, O'Connor C, Foley N, Madill J.","J Nutr Health Aging. 2015 Dec	172	association of B12 with dementia in B12 in high risk hospitalized patients
26607937	26607937,"Vitamin B-12 treatment of asymptomatic, deficient, elderly Chileans improves conductivity in myelinated peripheral nerves, but high serum folate impairs vitamin B-12 status response assessed by the combined indicator of vitamin B-12 status","Brito A, Verdugo R, Hertrampf E, Miller JW, Green R, Fedosov SN, Shahab-Ferdows S, Sanchez H, Albala C, Castillo JL, Matamala JM, Uauy R, Allen LH.…	173	Combined b treatment
26597770	26597770,"Metabolic vitamin B12 deficiency: a missed opportunity to prevent dementia and stroke","Spence JD.","Nutr Res. 2016 Feb	174	review
26523658	26523658,"Assessment of brain cognitive functions in patients with vitamin B12 deficiency using resting state functional MRI: A longitudinal study","Gupta L, Gupta RK, Gupta PK, Malhotra HS, Saha I, Garg RK.","Magn Reson Imaging. 2016 Feb	175	non-controlled suppl. Study with B12 on neurologic functions
26452305	26452305,"Symptoms and findings in adult-onset celiac disease in a historical Danish patient cohort","Schøsler L, Christensen LA, Hvas CL.","Scand J Gastroenterol. 2016 Mar	176	Risk group: Celiac disease
26407399	26407399,"Vitamin B12 deficiency--A 21st century perspective","Oo TH.","Clin Med (Lond). 2015 Aug	177	review
26310585	26310585,"Different Neurologic Aspects of Nutritional B12 Deficiency in Infancy","Yilmaz S, Serdaroglu G, Tekgul H, Gokben S.","J Child Neurol. 2016 Apr	178	Infant- Review
26299066	26299066,"Biochemical Identification of Vitamin B12 Deficiency in a Medical Office","Schwarz J, Morstadt E, Dura A, Wintgens KF, Hartmann K, Armbruster FP, Dschietzig T.","Clin Lab. 2015	179	purely biomarkers
26279228	26279228,"A retrospective study of 23 cases with subacute combined degeneration","Li J, Ren M, Dong A, Wu Y, Han N, Deng B, Bi X.","Int J Neurosci. 2016 Oct	180	SCAD not only due to B12 deficeincy
26239093	26239093,"Low Cobalamin Levels as Predictors of Cobalamin Deficiency: Importance of Comorbidities Associated with Increased Oxidative Stress","Solomon LR.","Am J Med. 2016 Jan	181	purely biomarkers
26179277	26179277,"Informing disinvestment with limited evidence: cobalamin deficiency in the fatigued","Mnatzaganian G, Karnon J, Moss JR, Elshaug AG, Metz M, Frank OR, Hiller JE	182	Cost-effectiveness
25998928	25998928,"Is vitamin B12 deficiency a risk factor for cardiovascular disease in vegetarians?","Pawlak R.","Am J Prev Med. 2015 Jun	183	review
25977272	25977272,"Whippits, nitrous oxide and the dangers of legal highs","Thompson AG, Leite MI, Lunn MP, Bennett DL.","Pract Neurol. 2015 Jun	184	review
25936607	25936607,"Autoimmune mechanisms in pernicious anaemia & thyroid disease","Osborne D, Sobczyńska-Malefora A.","Autoimmun Rev. 2015 Sep	185	review
25824066	25824066,"Vitamin B12 deficiency - A 21st century perspective ","Shipton MJ, Thachil J.","Clin Med (Lond). 2015 Apr	186	review
25756278	25756278,"Vitamin B12 deficiency in the elderly: is it worth screening?","Wong CW.","Hong Kong Med J. 2015 Apr	187	review
25720915	25720915,"Impact of haematologic deficiencies on recurrent aphthous ulceration: a meta-analysis","Chen H, Sui Q, Chen Y, Ge L, Lin M.","Br Dent J. 2015 Feb	188	Association with mouth ulceration- metaanalysis
25710280	25710280,"Vitamin B12-responsive neuropathies: A case series","Solomon LR.","Nutr Neurosci. 2016 May	189	Neuropathy: treated with B12 and followed up- no control intervention
25708265	25708265,"Assessment of functional and structural damage in brain parenchyma in patients with vitamin B12 deficiency: A longitudinal perfusion and diffusion tensor imaging study","Roy B, Trivedi R, Garg RK, Gupta PK, Tyagi R, Gupta RK.","Magn Reson Imaging. 2015 Jun	190	B12 treatment and subclinical neurological outcome
25651452	25651452,"Cobalamin deficiency in the elderly: aetiology and management: a study of 125 patients in a geriatric hospital","Couderc AL, Camalet J, Schneider S, Turpin JM, Bereder I, Boulahssass R, Gonfrier S, Bayer P, Guerin O, Brocker P.","J Nutr Health Aging. 2015 Feb	191	Risk group: elderly people
27397049	27397049,"""What an Affliction"": Mary Todd Lincoln's Fatal Pernicious Anemia","Sotos JG.","Perspect Biol Med. 2015	192	review
25525135	25525135,"Inflammatory, immunological, and intestinal disease biomarkers in Chinese Shar-Pei dogs with marked hypocobalaminemia","Grützner N, Heilmann RM, Cranford SM, Holzenburg A, Suchodolski JS, Steiner JM.","J Vet Diagn Invest. 2015 Jan	193	animals
25486369	25486369,"Vitamin B12 in obese adolescents with clinical features of insulin resistance","Ho M, Halim JH, Gow ML, El-Haddad N, Marzulli T, Baur LA, Cowell CT, Garnett SP.","Nutrients. 2014 Dec 4	194	Risk group: obese type 2 diabetes
25438485	25438485,"Neurological manifestations of B(12) deficiency with emphasis on its aetiology","Divate PG, Patanwala R.","J Assoc Physicians India. 2014 May	195	Neurological aspects of PA, manifestations
25331307	25331307,"The prevalence of low vitamin B12 status in people with type 2 diabetes receiving metformin therapy in New Zealand--a clinical audit","Haeusler S, Parry-Strong A, Krebs JD.","N Z Med J. 2014 Oct 17	196	Risk group: metformin
25324534	25324534,"Vitamin B12 and folate deficiency in chronic heart failure","van der Wal HH, Comin-Colet J, Klip IT, Enjuanes C, Grote Beverborg N, Voors AA, Banasiak W, van Veldhuisen DJ, Bruguera J, Ponikowski P, Jankowska EA, van der Meer P.","Heart. 2015 Feb	197	Associations with heart failure/ no causal inference
25309981	25309981,"Updated features associated with type 1 gastric carcinoids patients: a single-center study","Lahner E, Galli G, Esposito G, Pilozzi E, Corleto VD, Annibale B.","Scand J Gastroenterol. 2014 Dec	198	Risk group: gastric cancer
25299054	25299054,"Higher prevalence of metformin-induced vitamin B12 deficiency in sulfonylurea combination compared with insulin combination in patients with type 2 diabetes: a cross-sectional study","Kang D, Yun JS, Ko SH, Lim TS, Ahn YB, Park YM, Ko SH.","PLoS One. 2014 Oct 9	199	Risk group: metfromin & diabetes
25296737	25296737,"The changing of serum vitamin B12 and homocysteine levels after gastrectomy in patients with gastric cancer: do they associate with clinicopathological factors?","Bilici A, Sonkaya A, Ercan S, Ustaalioglu BB, Seker M, Aliustaoglu M, Orcun A, Gumus M.","Tumour Biol. 2015 Feb	200	Risk group: gastrectomy in gastric cancer
25283155	25283155,"Vitamin B12 deficiency is associated with adverse lipid profile in Europeans and Indians with type 2 diabetes","Adaikalakoteswari A, Jayashri R, Sukumar N, Venkataraman H, Pradeepa R, Gokulakrishnan K, Anjana RM, McTernan PG, Tripathi G, Patel V, Kumar S, Mohan V, Saravanan P.","Cardiovasc Diabetol. 2014 Sep 26	201	Associations of low B12 with hyperlipidemia
25270794	25270794,"Effectiveness of B vitamin supplementation following bariatric surgery: rapid increases of serum vitamin B12","Moore CE, Sherman V.","Obes Surg. 2015 Apr	202	Treatment of B12 after bariatric surgery
25170761	25170761,"High percentage of regulatory T cells before and after vitamin B12 treatment in patients with pernicious anemia","Watanabe S, Ide N, Ogawara H, Yokohama A, Mitsui T, Handa H, Koiso H, Tsukamoto N, Saitoh T, Murakami H.","Acta Haematol. 2015	203	not relevant
25143369	25143369,"Methylmalonic acid quantified in dried blood spots provides a precise, valid, and stable measure of functional vitamin B-12 status in healthy women","Schroder TH, Quay TA, Lamers Y.","J Nutr. 2014 Oct	204	purely biomarkers
25091368	25091368,"Clinical analysis of late-onset methylmalonic acidaemia and homocystinuria, cblC type with a neuropsychiatric presentation","Liu YR, Ji YF, Wang YL, Zhang BA, Fang GY, Wang JT, Sun GF, Lu H.","J Neurol Neurosurg Psychiatry. 2015 Apr	205	inherited form of B12 deficeincy
24942828	24942828,"Guidelines for the diagnosis and treatment of cobalamin and folate disorders","Devalia V, Hamilton MS, Molloy AM	206	review
24857760	24857760,"Prevalence of MR imaging abnormalities in vitamin B12 deficiency patients presenting with clinical features of subacute combined degeneration of the spinal cord","Jain KK, Malhotra HS, Garg RK, Gupta PK, Roy B, Gupta RK.","J Neurol Sci. 2014 Jul 15	207	SCAD Neurology and clinical symptoms
24736677	24736677,"Preventing vitamin B12 deficiency in South Asian women of childbearing age: a randomised controlled trial comparing an oral vitamin B12 supplement with B12 dietary advice","Mearns GJ, Koziol-McLain J, Obolonkin V, Rush EC.","Eur J Clin Nutr. 2014 Aug	208	dietary supplements
24732991	24732991,"Patient journeys: diagnosis and treatment of pernicious anaemia","Hooper M, Hudson P, Porter F, McCaddon A.","Br J Nurs. 2014 Apr 10-23	209	Pernicious anemia diagnosis and treatment- Data from health register
24719965	24719965,"Vitamin B-12 deficiency. Common, with troubling symptoms","","Mayo Clin Health Lett. 2013 Sep	210	comment
24625957	24625957,"Comment on: association of B12 deficiency and clinical neuropathy with metformin use in type 2 diabetes patients","Chowta MN, Tiwary G.","J Postgrad Med. 2014 Jan-Mar	211	comment
24625956	24625956,"Comment: association of B12 deficiency and clinical neuropathy with metformin use in type 2 diabetes patients","Shah VN.","J Postgrad Med. 2014 Jan-Mar	212	comment
24522476	24522476,"Older adult psychiatric inpatients with non-cognitive disorders should be screened for vitamin B12 deficiency","Lachner C, Martin C, John D, Nekkalapu S, Sasan A, Steinle N, Regenold WT.","J Nutr Health Aging. 2014	213	Risk group: elderly with psychiatric disorders
24422907	24422907,"Hydroxocobalamin supplementation and erythropoisis stimulating agent hyporesponsiveness in haemodialysis patients","Killen JP, Brenninger VL.","Nephrology (Carlton). 2014 Mar	214	Risk group: patients on hemodialysis treated with OH-B12
24379898	24379898,"Vitamin B12 intramuscular injections versus oral supplements: a budget impact analysis","Masucci L, Goeree R.","Ont Health Technol Assess Ser. 2013 Nov 1	215	economic impact
24379897	24379897,"Vitamin B12 and cognitive function: an evidence-based analysis","Health Quality Ontario.","Ont Health Technol Assess Ser. 2013 Nov 1	216	Treatment B12, dementia: syst. Review
24352086	24352086,"Neuroenhancement with vitamin B12-underestimated neurological significance","Gröber U, Kisters K, Schmidt J.","Nutrients. 2013 Dec 12	217	review
24346380	24346380,"Association of B12 deficiency and clinical neuropathy with metformin use in type 2 diabetes patients","Singh AK, Kumar A, Karmakar D, Jha RK.","J Postgrad Med. 2013 Oct-Dec	218	Risk group: metfromin & diabetes & neuropathy
24322997	24322997,"Diffusion tensor tractography and neuropsychological assessment in patients with vitamin B12 deficiency","Gupta PK, Garg RK, Gupta RK, Malhotra HS, Paliwal VK, Rathore RK, Verma R, Singh MK, Rai Y, Pandey CM.","Neuroradiology. 2014 Feb	219	Neurological tests -pre-post
24306216	24306216,"The prevalence of low serum vitamin B-12 status in the absence of anemia or macrocytosis did not increase among older U.S. adults after mandatory folic acid fortification","Qi YP, Do AN, Hamner HC, Pfeiffer CM, Berry RJ.","J Nutr. 2014 Feb	220	purely biomarkers
24300642	24300642,"Haematological implications of folate food fortification","Metz J.","S Afr Med J. 2013 Oct 11	221	review
24263693	24263693,"DTI correlates of cognition in conventional MRI of normal-appearing brain in patients with clinical features of subacute combined degeneration and biochemically proven vitamin B(12) deficiency","Gupta PK, Gupta RK, Garg RK, Rai Y, Roy B, Pandey CM, Malhotra HS, Narayana PA.","AJNR Am J Neuroradiol. 2014 May	222	SCAD treated with B12
24256995	24256995,"Clinical, nerve conduction and nerve biopsy study in vitamin B12 deficiency neurological syndrome with a short-term follow-up","Kalita J, Chandra S, Bhoi SK, Agarwal R, Misra UK, Shankar SK, Mahadevan A.","Nutr Neurosci. 2014 Jul	223	Neurology, treated, nerve biopsy
24248213	24248213,"Cobalamin deficiency: clinical picture and radiological findings","Briani C, Dalla Torre C, Citton V, Manara R, Pompanin S, Binotto G, Adami F.","Nutrients. 2013 Nov 15	224	review
24225845	24225845,"Vitamin B12 deficiency in relation to functional disabilities","Oberlin BS, Tangney CC, Gustashaw KA, Rasmussen HE.","Nutrients. 2013 Nov 12	225	B12 deficiency and functional disabilities
24195595	24195595,"Appropriate nutrient supplementation in celiac disease","Caruso R, Pallone F, Stasi E, Romeo S, Monteleone G.","Ann Med. 2013 Dec	226	review
24164696	24164696,"Vitamin B12 and folate deficiency: should we use a different cutoff value for hematologic disorders?","Toprak B, Yalcın HZ, Colak A.","Int J Lab Hematol. 2014 Aug	227	low B12 and anemia and macrocytosis
24064015	24064015,"Vitamin B12 levels in familial Mediterranean fever patients treated with colchicine","Gemici AI, Sevindik ÖG, Akar S, Tunca M.","Clin Exp Rheumatol. 2013 May-Jun	228	not relevant-med. fever
24129588	24129588,"Low holotranscobalamin and cobalamins predict incident fractures in elderly men: the MrOS Sweden","Lewerin C, Nilsson-Ehle H, Jacobsson S, Johansson H, Sundh V, Karlsson MK, Ljunggren Ö, Lorentzon M, Kanis JA, Lerner UH, Cummings SR, Ohlsson C, Mellström D.","Osteoporos Int. 2014 Jan	229	association with bone fracture - out of the scope
24107225	24107225,"Daily milk intake improves vitamin B-12 status in young vegetarian Indians: an intervention trial","Naik S, Bhide V, Babhulkar A, Mahalle N, Parab S, Thakre R, Kulkarni M.","Nutr J. 2013 Oct 9	230	dietary B12 range
24096753	24096753,"Vitamin B(12) deficiency after gastrectomy for gastric cancer: an analysis of clinical patterns and risk factors","Hu Y, Kim HI, Hyung WJ, Song KJ, Lee JH, Kim YM, Noh SH.","Ann Surg. 2013 Dec	231	Risk group: gastric resection and cancer
24091055	24091055,"Vitamin B12 deficiency in patients undergoing bariatric surgery: preventive strategies and key recommendations","Majumder S, Soriano J, Louie Cruz A, Dasanu CA.","Surg Obes Relat Dis. 2013 Nov-Dec	232	Treatment in bariatric surgery- sys. Rev
24010640	24010640,"Do MCI patients with vitamin B12 deficiency have distinctive cognitive deficits?","Silva D, Albers U, Santana I, Vicente M, Martins IP, Verdelho A, Guerreiro M, de-Mendonça A.","BMC Res Notes. 2013 Sep 8	233	mild cog. Dys- associations
23998863	23998863,"Vitamin B12 deficiency in India: mean corpuscular volume is an unreliable screening parameter","Bhatia P, Kulkarni JD, Pai SA.","Natl Med J India. 2012 Nov-Dec	234	Deficiency symptoms, clinical picture, blood smear
23909117	23909117,"Vitamin B12 levels in patients with tinnitus and effectiveness of vitamin B12 treatment on hearing threshold and tinnitus","Berkiten G, Yildirim G, Topaloglu I, Ugras H.","B-ENT. 2013	235	associations tennitus
23879674	23879674,"Hematological study of patients with aphthous stomatitis","Lopez-Jornet P, Camacho-Alonso F, Martos N.","Int J Dermatol. 2014 Feb	236	not primarily on B12
23842487	23842487,"Hemolysis and schistocytosis in the emergency department: consider pseudothrombotic microangiopathy related to vitamin B12 deficiency","Noël N, Maigné G, Tertian G, Anguel N, Monnet X, Michot JM, Goujard C, Lambotte O.","QJM. 2013 Nov	237	low relevance
23834498	23834498,"Prospective assessment of peripheral neuropathy in Duodopa-treated parkinsonian patients","Merola A, Zibetti M, Rizzone MG, Troiano M, Artusi CA, Angrisano S, Cocito D, Lopiano L.","Acta Neurol Scand. 2014 Jan	238	not primarily on B12
23708236	23708236,"Indications for cobalamin level assessment in departments of internal medicine: a prospective practice survey","Chiche L, Mancini J, Arlet JB	239	Medical Practice: indications for B12 assessement in an internal medicine Department France
23686033	23686033,"Vitamin B₁₂ levels and psychiatric symptomatology: a case series","Jayaram N, Rao MG, Narasimha A, Raveendranathan D, Varambally S, Venkatasubramanian G, Gangadhar BN.","J Neuropsychiatry Clin Neurosci. 2013 Spring	240	Psychiatric symptoms- case series
23612630	23612630,"MTHFR C677T polymorphism, folate, vitamin B12 and homocysteine in recurrent pregnancy losses: a case control study among North Indian women","Puri M, Kaur L, Walia GK, Mukhopadhhyay R, Sachdeva MP, Trivedi SS, Ghosh PK, Saraswathy KN.","J Perinat Med. 2013 Sep 1	241	associations with recurrent pregnancy loss, no evidence for causality
23458644	23458644,"Canine breed predispositions for marked hypocobalaminaemia or decreased folate concentration assessed by a laboratory survey","Dandrieux JR, Noble PJ, Halladay LJ, McLean L, German AJ.","J Small Anim Pract. 2013 Mar	242	animals
23449527	23449527,"B vitamin therapy for homocysteine: renal function and vitamin B12 determine cardiovascular outcomes","Spence JD.","Clin Chem Lab Med. 2013 Mar 1	243	review
23447660	23447660,"The pathophysiology of elevated vitamin B12 in clinical practice","Andrès E, Serraj K, Zhu J, Vermorken AJ.","QJM. 2013 Jun	244	review
23416723	23416723,"Diagnosis and management of clinical and subclinical cobalamin deficiencies: why controversies persist in the age of sensitive metabolic testing","Carmel R.","Biochimie. 2013 May	245	review
23400269	23400269,"A multicenter retrospective analysis of the clinical features of pernicious anemia in a Korean population","Song IC, Lee HJ, Kim HJ, Bae SB, Lee KT, Yang YJ, Park SY, Cho DY, Kim NY, Cho IS, Jo DY.","J Korean Med Sci. 2013 Feb	246	Pernicious anemia symptoms
23330849	23330849,"Utility and limitations of biochemical markers of vitamin B12 deficiency","Herrmann W, Obeid R.","Eur J Clin Invest. 2013 Mar	247	purely biomarkers
23301732	23301732,"Clinical practice. Vitamin B12 deficiency","Stabler SP.","N Engl J Med. 2013 Jan 10	248	review
23297780	23297780,"Significant reduction of serum homocysteine level and oral symptoms after different vitamin-supplement treatments in patients with burning mouth syndrome","Sun A, Lin HP, Wang YP, Chen HM, Cheng SJ, Chiang CP.","J Oral Pathol Med. 2013 Jul	249	not specific for B12 and burning mouth syndrom
23270350	23270350,"Serum cobalamin and methylmalonic acid concentrations in dogs with chronic gastrointestinal disease","Berghoff N, Parnell NK, Hill SL, Suchodolski JS, Steiner JM.","Am J Vet Res. 2013 Jan	250	purely biomarkers
23262189	23262189,"Laboratory evaluation for vitamin B12 deficiency: the case for cascade testing","Berg RL, Shaw GR.","Clin Med Res. 2013 Feb	251	B12 treatment and clinical improvement
23241609	23241609,"Proteomics of vitamin B12 processing","Hannibal L, DiBello PM, Jacobsen DW.","Clin Chem Lab Med. 2013 Mar 1	252	Purely proteomics
23241600	23241600,"Unexpected high plasma cobalamin : proposal for a diagnostic strategy","Arendt JF, Nexo E.","Clin Chem Lab Med. 2013 Mar 1	253	review
23236022	23236022,"A vitamin B-12 supplement of 500 μg/d for eight weeks does not normalize urinary methylmalonic acid or other biomarkers of vitamin B-12 status in elderly people with moderately poor vitamin B-12 status","Hill MH, Flatley JE, Barker ME, Garner CM, Manning NJ, Olpin SE, Moat SJ, Russell J, Powers HJ.","J Nutr. 2013 Feb	254	B12 treatment and biomarker response
23183296	23183296,"The discovery of vitamin B(12)","Scott JM, Molloy AM.","Ann Nutr Metab. 2012	255	review
23148851	23148851,"Exocrine pancreatic insufficiency in the cat","Steiner JM.","Top Companion Anim Med. 2012 Aug	256	not relevant-animals
22826498	22826498,"Maternal anemia at first antenatal visit: prevalence and risk factors in a malaria-endemic area in Benin","Ouédraogo S, Koura GK, Accrombessi MM, Bodeau-Livinec F, Massougbodji A, Cot M.","Am J Trop Med Hyg. 2012 Sep	257	Material anemia/risk factors
22781060	22781060,"A study of neurobehavioral, clinical psychometric, and P3 changes in vitamin B12 deficiency neurological syndrome","Kalita J, Agarwal R, Chandra S, Misra UK.","Nutr Neurosci. 2013 Jan	258	B12 treatment and neurological symptoms
22770998	22770998,"Recommendations for diagnosis and management of metformin-induced vitamin B12 (Cbl) deficiency","Mazokopakis EE, Starakis IK.","Diabetes Res Clin Pract. 2012 Sep	259	review
22710370	22710370,"Clinical profiles, endoscopic and laboratory features and associated factors in patients with autoimmune gastritis","Soykan I, Yakut M, Keskin O, Bektaş M.","Digestion. 2012	260	Gastrointestinal tests to detect causes of malabsorption
22690982	22690982,"Relationship between vitamin B12 and sensory and motor peripheral nerve function in older adults","Leishear K, Boudreau RM, Studenski SA, Ferrucci L, Rosano C, de Rekeneire N, Houston DK, Kritchevsky SB, Schwartz AV, Vinik AI, Hogervorst E, Yaffe K, Harris TB, Newman AB, Strotmeyer ES	261	Neurological aspects of B12 deficiency
22684818	22684818,"Nutritional profile of patients before and after Roux-en-Y gastric bypass: 3-year follow-up","Blume CA, Boni CC, Casagrande DS, Rizzolli J, Padoin AV, Mottin CC.","Obes Surg. 2012 Nov	262	Gastric bypass on B12 supplements for 3 years
22659999	22659999,"Vitamin B-12 supplementation improves arterial function in vegetarians with subnormal vitamin B-12 status","Kwok T, Chook P, Qiao M, Tam L, Poon YK, Ahuja AT, Woo J, Celermajer DS, Woo KS.","J Nutr Health Aging. 2012	263	not relevant B12 treatment in vegetarians and arterial function
22650964	22650964,"Oral versus intramuscular administration of vitamin B12 for the treatment of patients with vitamin B12 deficiency: a pragmatic, randomised, multicentre, non-inferiority clinical trial undertaken in the primary healthcare setting (Project OB12)","Sanz-Cuesta T, González-Escobar P, Riesgo-Fuertes R, Garrido-Elustondo S, del Cura-González I, Martín-Fernández J, Escortell-Mayor E, Rodríguez…	264	Treatment with B12 oral vs. i.m
22456786	22456786,"Vitamin B12 deficiency in Australian residential aged care facilities","Mirkazemi C, Peterson GM, Tenni PC, Jackson SL.","J Nutr Health Aging. 2012 Mar	265	Risk group: elderly
22450609	22450609,"The neuropsychiatry of vitamin B12 deficiency in elderly patients","Lachner C, Steinle NI, Regenold WT.","J Neuropsychiatry Clin Neurosci. 2012 Winter	266	review
22424943	22424943,"Does an elevated serum vitamin B(12) level mask actual vitamin B(12) deficiency in myeloproliferative disorders?","Gauchan D, Joshi N, Gill AS, Patel V, Debari VA, Guron G, Maroules M.","Clin Lymphoma Myeloma Leuk. 2012 Aug	267	Diagnosing B12 deficiency in a risk group oncology
22417980	22417980,"No increased mortality risk in older persons with unexplained anaemia","Willems JM, den Elzen WP, Vlasveld LT, Westendorp RG, Gussekloo J, de Craen AJ, Blauw GJ.","Age Ageing. 2012 Jul	268	not relevant
22393558	22393558,"Clinical inquiry: Is high-dose oral B12 a safe and effective alternative to a B12 injection?","Lin J, Kelsberg G, Safranek S.","J Fam Pract. 2012 Mar	269	clinical inquiry
22387252	22387252,"Common features of patients with autoimmune atrophic gastritis","Miceli E, Lenti MV, Padula D, Luinetti O, Vattiato C, Monti CM, Di Stefano M, Corazza GR.","Clin Gastroenterol Hepatol. 2012 Jul	270	atrophic gastritis associated symptoms
22318813	22318813,"Sequential involvement of the nervous system in subacute combined degeneration","Minn YK, Kim SM, Kim SH, Kwon KH, Sunwoo IN.","Yonsei Med J. 2012 Mar	271	SCAD and low B12
22302152	22302152,"Screening for metabolic vitamin B12 deficiency by holotranscobalamin in patients suspected of vitamin B12 deficiency: a multicentre study","Heil SG, de Jonge R, de Rotte MC, van Wijnen M, Heiner-Fokkema RM, Kobold AC, Pekelharing JM, Adriaansen HJ, Sanders E, Trienekens PH, Rammeloo T, Lindemans J.","Ann Clin Biochem. 2012 Mar	272	purely biomarkers
22301932	22301932,"Determinants of urinary methylmalonic acid concentration in an elderly population in the United Kingdom","Flatley JE, Garner CM, Al-Turki M, Manning NJ, Olpin SE, Barker ME, Powers HJ.","Am J Clin Nutr. 2012 Mar	273	purely biomarkers
22241075	22241075,"Subclinical cobalamin deficiency","Carmel R.","Curr Opin Gastroenterol. 2012 Mar	274	review
22226502	22226502,"Vitamin B12 supplementation improves heart rate variability in healthy elderly Indian subjects","Sucharita S, Thomas T, Antony B, Vaz M.","Auton Neurosci. 2012 May 21	275	outcome heart rate not relevant for diagnosis
22221769	22221769,"Cognitive impairment and vitamin B12: a review","Moore E, Mander A, Ames D, Carne R, Sanders K, Watters D.","Int Psychogeriatr. 2012 Apr	276	review
22069468	22069468,"Status of B-vitamins and homocysteine in diabetic retinopathy: association with vitamin-B12 deficiency and hyperhomocysteinemia","Satyanarayana A, Balakrishna N, Pitla S, Reddy PY, Mudili S, Lopamudra P, Suryanarayana P, Viswanath K, Ayyagari R, Reddy GB.","PLoS One. 2011	277	Risk group: diabetes
22049200	22049200,"Neuropathy in Parkinson disease: prevalence and determinants","Rajabally YA, Martey J.","Neurology. 2011 Nov 29	278	Risk group: Parkinson
21952034	21952034,"Comparison of two modes of vitamin B12 supplementation on neuroconduction and cognitive function among older people living in Santiago, Chile: a cluster randomized controlled trial. a study protocol [ISRCTN 02694183]","Sánchez H, Albala C, Lera L, Castillo JL, Verdugo R, Lavados M, Hertrampf E, Brito A, Allen L, Uauy R.","Nutr J. 2011 Sep 27	279	protocol
21940283	21940283,"Effect of metformin therapy on vitamin D and vitamin B₁₂ levels in patients with type 2 diabetes mellitus","Kos E, Liszek MJ, Emanuele MA, Durazo-Arvizu R, Camacho P.","Endocr Pract. 2012 Mar-Apr	280	Risk group: Metformin
21886036	21886036,"Recent diabetes issues affecting the primary care clinician","Sando KR, Barboza J, Willis C, Taylor J.","South Med J. 2011 Jun	281	review
21716160	21716160,"Diagnostic performance of serum cobalamin tests: a systematic review and meta-analysis","Willis CD, Elshaug AG, Milverton JL, Watt AM, Metz MP, Hiller JE	282	Syst. Review for use of B12 in diagnosis
21671542	21671542,"Update on vitamin B12 deficiency","Langan RC, Zawistoski KJ.","Am Fam Physician. 2011 Jun 15	283	review
21600388	21600388,"Comparing the efficacy and tolerability of a new daily oral vitamin B12 formulation and intermittent intramuscular vitamin B12 in normalizing low cobalamin levels: a randomized, open-label, parallel-group study","Castelli MC, Friedman K, Sherry J, Brazzillo K, Genoble L, Bhargava P, Riley MG.","Clin Ther. 2011 Mar	284	RCT-open label 2 B12 preparations
21593512	21593512,"Biomarkers of vitamin B-12 status in NHANES: a roundtable summary","Yetley EA, Pfeiffer CM, Phinney KW, Bailey RL, Blackmore S, Bock JL, Brody LC, Carmel R, Curtin LR, Durazo-Arvizu RA, Eckfeldt JH, Green R, Gregory JF 3rd, Hoofnagle AN, Jacobsen DW, Jacques PF, Lacher DA, Molloy AM, Massaro J, Mills JL, Nexo E, Rader JI, Selhub J, Sempos C, Shane B, Stabler S, Stover P, Tamura T, Tedst…	285	review
21593511	21593511,"Biomarkers of cobalamin (vitamin B-12) status in the epidemiologic setting: a critical overview of context, applications, and performance characteristics of cobalamin, methylmalonic acid, and holotranscobalamin II","Carmel R.","Am J Clin Nutr. 2011 Jul	286	review
21593504	21593504,"Overview of a roundtable on NHANES monitoring of biomarkers of folate and vitamin B-12 status: measurement procedure issues","Yetley EA, Coates PM, Johnson CL.","Am J Clin Nutr. 2011 Jul	287	review
21593496	21593496,"Holotranscobalamin, a marker of vitamin B-12 status: analytical aspects and clinical utility","Nexo E, Hoffmann-Lücke E.","Am J Clin Nutr. 2011 Jul	288	review
21590622	21590622,"Acute and subacute encephalopathies: deficiency states (nutritional)","Kumar N.","Semin Neurol. 2011 Apr	289	review
21556950	21556950,"Oral vitamin B12 replacement: an effective treatment for vitamin B12 deficiency after total gastrectomy in gastric cancer patients","Kim HI, Hyung WJ, Song KJ, Choi SH, Kim CB, Noh SH.","Ann Surg Oncol. 2011 Dec	290	Treatment- single arm study
21553339	21553339,"Dual pathology as a result of spinal stenosis and vitamin B12 deficiency","Patel MS, Rasul Z, Sell P.","Eur Spine J. 2011 Dec	291	elderly people with spinal stenosis (hospital archive)
21493159	21493159,"Bladder augmentation and urinary diversion in patients with neurogenic bladder: non-surgical considerations","Stein R, Schröder A, Thüroff JW.","J Pediatr Urol. 2012 Apr	292	not relevant
21482749	21482749,"Diagnostic accuracy of holotranscobalamin, methylmalonic acid, serum cobalamin, and other indicators of tissue vitamin B₁₂ status in the elderly","Valente E, Scott JM, Ueland PM, Cunningham C, Casey M, Molloy AM.","Clin Chem. 2011 Jun	293	purely biomarkers
21430638	21430638,"Vitamin B12 deficiency in resettled Bhutanese refugees--United States, 2008-2011","Centers for Disease Control and Prevention (CDC).","MMWR Morb Mortal Wkly Rep. 2011 Mar 25	294	Risk group: refugees
21426888	21426888,"Parenteral vitamin B12 in macrocytic hemodialysis patients reduced MMA levels but did not change mean red cell volume or hemoglobin","Su VC, Shalansky K, Jastrzebski J, Martyn A, Li G, Yeung CK, Snyder F, Zalunardo N.","Clin Nephrol. 2011 Apr	295	B12 treatment in macrocytic hemodialysis patients
21369672	21369672,"Biomarkers of cobalamin (vitamin B12) deficiency and its application","Chatthanawaree W.","J Nutr Health Aging. 2011 Mar	296	purely biomarkers
21248188	21248188,"Unexplained chronic cough and vitamin B-12 deficiency","Bucca CB, Culla B, Guida G, Sciascia S, Bellone G, Moretto A, Heffler E, Bugiani M, Rolla G, Brussino L.","Am J Clin Nutr. 2011 Mar	297	inherited form of B12 deficeincy
21079297	21079297,"The relationship between serum trace elements, vitamin B12, folic acid and clinical parameters in patients with myofascial pain syndrome","Okumus M, Ceceli E, Tuncay F, Kocaoglu S, Palulu N, Yorgancioglu ZR.","J Back Musculoskelet Rehabil. 2010	298	association study no evidence on causality
20851295	20851295,"Folic Acid and vitamin B12 supplementation improves coronary flow reserve in elderly subjects with vitamin B12 deficiency","Kurt R, Yilmaz Y, Ermis F, Kalayoglu Besisik S, Polat N, Elitok A, Oflaz H, Karan MA.","Arch Med Res. 2010 Jul	299	B-vitamins suppl. With folic acid
20699251	20699251,"Hyperhomocysteinemia prevalence among patients with venous thromboembolism","Köktürk N, Kanbay A, Aydoğdu M, Özyılmaz E, Bukan N, Ekim N.","Clin Appl Thromb Hemost. 2011 Oct	300	associations with thrombosis
20659263	20659263,"Modulation of serum gastric parietal cell antibody level by levamisole and vitamin B12 in oral lichen planus","Lin HP, Wang YP, Chia JS, Chiang CP, Sun A.","Oral Dis. 2011 Jan	301	of low relevance
20603044	20603044,"Serum vitamin B12 and folate status in patients with inflammatory bowel diseases","Yakut M, Ustün Y, Kabaçam G, Soykan I.","Eur J Intern Med. 2010 Aug	302	Risk group inflammatory bowel diseases (Crohn, ulcerative colitis)
20589460	20589460,"Megaloblastic anemia: back in focus","Chandra J.","Indian J Pediatr. 2010 Jul	303	review
20573208	20573208,"Subnormal vitamin B12 concentrations and anaemia in older people: a systematic review","den Elzen WP, van der Weele GM, Gussekloo J, Westendorp RG, Assendelft WJ.","BMC Geriatr. 2010 Jun 23	304	Syst. Review Risk group: elderly people
20570873	20570873,"Vitamin B-12 deficiency. Monitor for up to two years after symptoms resolve","Patel A.","BMJ. 2010 Jun 22	305	low relevance
20488910	20488910,"Long term treatment with metformin in patients with type 2 diabetes and risk of vitamin B-12 deficiency: randomised placebo controlled trial","de Jager J, Kooy A, Lehert P, Wulffelé MG, van der Kolk J, Bets D, Verburg J, Donker AJ, Stehouwer CD.","BMJ. 2010 May 20	306	Risk group: metformin
20391044	20391044,"Vitamin B(12) deficiency is linked with long-term use of proton pump inhibitors in institutionalized older adults: could a cyanocobalamin nasal spray be beneficial?","Rozgony NR, Fang C, Kuczmarski MF, Bob H.","J Nutr Elder. 2010 Jan	307	Risk group: PPI use and cobalamin treatment
20372680	20372680,"Vitamin B12 deficiency - why refugee patients are at high risk","Benson J, Maldari T, Turnbull T.","Aust Fam Physician. 2010 Apr	308	review
20214143	20214143,"Serum folate and vitamin B12 status in healthy Iranian adults","Shams M, Homayouni K, Omrani GR.","East Mediterr Health J. 2009 Sep-Oct	309	purely biomarkers
20206879	20206879,"Functional vitamin B12 deficiency in alcoholics: an intriguing finding in a retrospective study of megaloblastic anemic patients","Fragasso A, Mannarella C, Ciancio A, Sacco A.","Eur J Intern Med. 2010 Apr	310	Risk group: alcoholism-Megaloblastic anemia and B12 deficiency
20187536	20187536,"High frequency of low serum levels of vitamin 12 among patients attending Jordan University Hospital","Barghouti FF, Younes NA, Halaseh LJ, Said TT, Ghraiz SM.","East Mediterr Health J. 2009 Jul-Aug	311	purely biomarkers
20158555	20158555,"Association between vitamin B12 levels and mortality in hospitalized older adults","Tal S, Shavit Y, Stern F, Malnick S.","J Am Geriatr Soc. 2010 Mar	312	association of high B12 and mortality
20108213	20108213,"Effect of a Klamath algae product (""AFA-B12"") on blood levels of vitamin B12 and homocysteine in vegan subjects: a pilot study","Baroni L, Scoglio S, Benedetti S, Bonetto C, Pagliarani S, Benedetti Y, Rocchi M, Canestrari F.","Int J Vitam Nutr Res. 2009 Mar	313	dietary intervention
20088746	20088746,"Efficacy of oral cobalamin (vitamin B12) therapy","Andrès E, Fothergill H, Mecili M.","Expert Opin Pharmacother. 2010 Feb	314	Syst. Rev. Treatment with oral B12
19961395	19961395,"Determination of serum holotranscobalamin concentrations with the AxSYM active B(12) assay: cut-off point evaluation in the clinical laboratory","Bamonti F, Moscato GA, Novembrino C, Gregori D, Novi C, De Giuseppe R, Galli C, Uva V, Lonati S, Maiavacca R.","Clin Chem Lab Med. 2010 Feb	315	purely biomarkers
19888941	19888941,"Haematological deficiencies in patients with recurrent aphthosis","Compilato D, Carroccio A, Calvino F, Di Fede G, Campisi G.","J Eur Acad Dermatol Venereol. 2010 Jun	316	unspecific associations- no evidence for causality
19734399	19734399,"The prevalence of vitamin B(12) deficiency in patients with type 2 diabetes: a cross-sectional study","Pflipsen MC, Oh RC, Saguil A, Seehusen DA, Seaquist D, Topolski R.","J Am Board Fam Med. 2009 Sep-Oct	317	Risk group: diabetes
19633703	19633703,"An investigation of vitamin B12 deficiency in elderly inpatients in neurology department","Wang YH, Yan F, Zhang WB, Ye G, Zheng YY, Zhang XH, Shao FY.","Neurosci Bull. 2009 Aug	318	unspecific associations- no evidence for causality
19570123	19570123,"Homocysteine, vitamin B12, folate and cognitive functions: a systematic and critical review of the literature","Vogel T, Dali-Youcef N, Kaltenbach G, Andrès E.","Int J Clin Pract. 2009 Jul	319	associations
19453682	19453682,"Cobalamin, folic acid, and homocysteine","Varela-Moreiras G, Murphy MM, Scott JM.","Nutr Rev. 2009 May	320	review
20929023	20929023,"Vitamin B12 deficiency--a major cause of megaloblastic anaemia in patients attending a tertiary care hospital","Iqbal SP, Kakepoto GN, Iqbal SP.","J Ayub Med Coll Abbottabad. 2009 Jul-Sep	321	Megaloblastic anema and B12 deficiency
19525662	19525662,"Pattern of thyroid autoimmunity in chinese patients with pernicious anemia","Chan JC, Liu HS, Kho BC, Lau TK, Li VL, Chan FH, Leong IS, Pang HK, Lee CK, Liang YS.","Am J Med Sci. 2009 Jun	322	Autoimmune disorders in PA-low relevance?
19464701	19464701,"Cumulative incidence of vitamin B12 deficiency in patients with Alzheimer disease","Prodan CI, Cowan LD, Stoner JA, Ross ED.","J Neurol Sci. 2009 Sep 15	323	Risk group: patients with Alzheimer disease
19171834	19171834,"Biochemical indicators of vitamin B12 and folate insufficiency and cognitive decline","Tangney CC, Tang Y, Evans DA, Morris MC.","Neurology. 2009 Jan 27	324	Risk group: elderly and cog. Decline
19153635	19153635,"Bladder dysfunction in subacute combined degeneration: a clinical, MRI and urodynamic study","Misra UK, Kalita J, Kumar G, Kapoor R.","J Neurol. 2008 Dec	325	SCAD: and symptom reversibility after B12 treatment
19150051	19150051,"Thyroid and gastric autoimmune diseases","Morel S, Georges A, Bordenave L, Corcuff JB.","Ann Endocrinol (Paris). 2009 Mar	326	Thyroid and autoimmune disease- not primarily PA
19141694	19141694,"Is it time for vitamin B-12 fortification? What are the questions?","Green R.","Am J Clin Nutr. 2009 Feb	327	review
19049561	19049561,"Chronic acquired sensory neuron diseases","Damasceno A, França MC Jr, Nucci A.","Eur J Neurol. 2008 Dec	328	not primarily on B12
18997463	18997463,"Folate, vitamin B12 and homocysteine status in women of childbearing age: baseline data of folic acid wheat flour fortification in Iran","Abdollahi Z, Elmadfa I, Djazayeri A, Sadeghian S, Freisling H, Mazandarani FS, Mohamed K.","Ann Nutr Metab. 2008	329	purely biomarkers
18925978	18925978,"Cognitive and psychiatric effects of vitamin B12 replacement in dementia with low serum B12 levels: a nursing home study","van Dyck CH, Lyness JM, Rohrbaugh RM, Siegal AP.","Int Psychogeriatr. 2009 Feb	330	effects of B12 replacement on congnitive and psychiatric symptoms
18845771	18845771,"Quantification of methylmalonic acid in human plasma with hydrophilic interaction liquid chromatography separation and mass spectrometric detection","Lakso HA, Appelblad P, Schneede J.","Clin Chem. 2008 Dec	331	purely biomarkers
18779510	18779510,"Vitamin B12 status and rate of brain volume loss in community-dwelling elderly","Vogiatzoglou A, Refsum H, Johnston C, Smith SM, Bradley KM, de Jager C, Budge MM, Smith AD.","Neurology. 2008 Sep 9	332	B12 markers and brain volume loss
18709892	18709892,"Review of interventions for the prevention and control of folate and vitamin B12 deficiencies","Cordero JF, Do A, Berry RJ.","Food Nutr Bull. 2008 Jun	333	review
18709891	18709891,"Efficacy and safety of fortification and supplementation with vitamin B12: biochemical and physiological effects","Carmel R.","Food Nutr Bull. 2008 Jun	334	review
18689370	18689370,"Bread cofortified with folic acid and vitamin B-12 improves the folate and vitamin B-12 status of healthy older people: a randomized controlled trial","Winkels RM, Brouwer IA, Clarke R, Katan MB, Verhoef P.","Am J Clin Nutr. 2008 Aug	335	dietary intake range 9 µg/d
18606874	18606874,"How I treat cobalamin (vitamin B12) deficiency","Carmel R.","Blood. 2008 Sep 15	336	review
18491996	18491996,"Mecobalamin","Zhang YF, Ning G.","Expert Opin Investig Drugs. 2008 Jun	337	review
18350363	18350363,"Vitamin B12 deficiency neurological syndromes: correlation of clinical, MRI and cognitive evoked potential","Kalita J, Misra UK.","J Neurol. 2008 Mar	338	Neurological symptoms of B12 deficeincy
18315582	18315582,"Vitamin B12 deficiency in hypersecretors during long-term acid suppression with proton pump inhibitors","Hirschowitz BI, Worthington J, Mohnen J.","Aliment Pharmacol Ther. 2008 Jun 1	339	Risk group: PPI use
18234134	18234134,"B-vitamins and prevention of dementia","Clarke R.","Proc Nutr Soc. 2008 Feb	340	review
18214631	18214631,"Prevalence of iron, folate, and vitamin B12 deficiency anemia after laparoscopic Roux-en-Y gastric bypass","Vargas-Ruiz AG, Hernández-Rivera G, Herrera MF.","Obes Surg. 2008 Mar	341	Risk group: gastric bypass and B12 deficeincy
18080853	18080853,"Hyperhomocysteinemia is associated with cognitive impairment in multiple sclerosis","Russo C, Morabito F, Luise F, Piromalli A, Battaglia L, Vinci A, Trapani Lombardo V, de Marco V, Morabito P, Condino F, Quattrone A, Aguglia U.","J Neurol. 2008 Jan	342	associations with cog function in MS
18032219	18032219,"Age-related hearing loss, methylmalonic acid, and vitamin B12 status in older adults","Park S, Johnson MA, Shea-Miller K, De Chicchis AR, Allen RH, Stabler SP.","J Nutr Elder. 2006	343	B12 deficiency and hearing loss incl. Treatment with B12
17991650	17991650,"Low vitamin B-12 status and risk of cognitive decline in older adults","Clarke R, Birks J, Nexo E, Ueland PM, Schneede J, Scott J, Molloy A, Evans JG.","Am J Clin Nutr. 2007 Nov	344	Longitudinal association of B12 status and cog. Decline
17972439	17972439,"If high folic acid aggravates vitamin B12 deficiency what should be done about it?","Johnson MA.","Nutr Rev. 2007 Oct	345	review
17938043	17938043,"Hematologic problems in psychosomatic medicine","Becker M, Axelrod DJ, Oyesanmi O, Markov DD, Kunkel EJ.","Psychiatr Clin North Am. 2007 Dec	346	review
17824912	17824912,"Evaluation of reticulocyte parameters in iron deficiency, vitamin B(12) deficiency and beta-thalassemia minor patients","Ceylan C, Miskioğlu M, Colak H, Kiliççioğlu B, Ozdemir E.","Int J Lab Hematol. 2007 Oct	347	not primarily B12
17636474	17636474,"Anemia in celiac disease is multifactorial in etiology","Harper JW, Holleran SF, Ramakrishnan R, Bhagat G, Green PH.","Am J Hematol. 2007 Nov	348	coliac disease prevelance of abnormal biomarkers
17561285	17561285,"Vitamin B(12) supplementation did not improve cognition but reduced delirium in demented patients with vitamin B(12) deficiency","Kwok T, Lee J, Lam L, Woo J.","Arch Gerontol Geriatr. 2008 May-Jun	349	Effect of B12 suppl. On cognition, delirium in demented elderly
17515548	17515548,"Neurologic complications of gastric bypass surgery for morbid obesity","Juhasz-Pocsine K, Rudnicki SA, Archer RL, Harik SI.","Neurology. 2007 May 22	350	B12 deficeincy and mylopathy in obese people
17474892	17474892,"Diagnostic clues to megaloblastic anaemia without macrocytosis","Chan CW, Liu SY, Kho CS, Lau KH, Liang YS, Chu WR, Ma SK.","Int J Lab Hematol. 2007 Jun	351	masking macrocytosis by thalassamia or iron deficeincy
17474166	17474166,"Vitamin B12 and the risk of neural tube defects in a folic-acid-fortified population","Ray JG, Wyatt PR, Thompson MD, Vermeulen MJ, Meier C, Wong PY, Farrell SA, Cole DE.","Epidemiology. 2007 May	352	B12 and NTD -birth defects
17420435	17420435,"Vitamin B12 deficiency in patients receiving metformin: clinical data","Andrès E, Federici L.","Arch Intern Med. 2007 Apr 9	353	comment
17308217	17308217,"Comparison of clinical and electrodiagnostic features in B12 deficiency neurological syndromes with and without antiparietal cell antibodies","Misra UK, Kalita J.","Postgrad Med J. 2007 Feb	354	Neurological symptoms of B12 and antiparital cell antibodies
17217902	17217902,"Clinical inquiries. How do we evaluate a marginally low B12 level?","Cravens DD, Nashelsky J, Oh RC.","J Fam Pract. 2007 Jan	355	inquiry
17215186	17215186,"Oral vitamin B12 supplementation reduces plasma total homocysteine concentration in women in India","Yajnik CS, Lubree HG, Thuse NV, Ramdas LV, Deshpande SS, Deshpande VU, Deshpande JA, Uradey BS, Ganpule AA, Naik SS, Joshi NP, Farrant H, Refsum H.","Asia Pac J Clin Nutr. 2007	356	effect of B12 on lowering tHcy- no clinical outcomes
17209473	17209473,"Prevalence of anemia among pregnant women and adolescent girls in 16 districts of India","Toteja GS, Singh P, Dhillon BS, Saxena BN, Ahmed FU, Singh RP, Prakash B, Vijayaraghavan K, Singh Y, Rauf A, Sarma UC, Gandhi S, Behl L, Mukherjee K, Swami SS, Meru V, Chandra P, Chandrawati, Mohan U.","Food Nutr Bull. 2006 Dec	357	Prevalence of anemia-no B12 measurements
17209186	17209186,"Plasma B vitamins and their relation to the severity of chronic heart failure","Herrmann M, Müller S, Kindermann I, Günther L, König J, Böhm M, Herrmann W.","Am J Clin Nutr. 2007 Jan	358	B12 and heart failure, no causal inference is possible
17162803	17162803,"I am 76 and in good physical health, but lately I've been suffering from frequent memory lapses. Recently, I read that a vitamin B12 deficiency can cause memory problems. Would B12 supplements help improve my memory?","","Health News. 2006 Oct	359	not relevant
17043022	17043022,"Diagnosis and treatment of vitamin B12 deficiency--an update","Hvas AM, Nexo E.","Haematologica. 2006 Nov	360	review
17042761	17042761,"Detection of early abnormalities in gastric function in first-degree relatives of patients with pernicious anemia","Juncà J, de Soria PL, Granada ML, Flores A, Márquez E.","Eur J Haematol. 2006 Dec	361	Abnormal gastric functions in familial forms of PA
17030830	17030830,"Risk factors of vitamin B(12) deficiency in patients receiving metformin","Ting RZ, Szeto CC, Chan MH, Ma KK, Chow KM.","Arch Intern Med. 2006 Oct 9	362	Risk group: metformin use
17002799	17002799,"Homocysteine, vitamin B12 and folate levels in premature coronary artery disease","Sadeghian S, Fallahi F, Salarifar M, Davoodi G, Mahmoodian M, Fallah N, Darvish S, Karimi A	363	Hcy and CAD-not primarily B12
16986134	16986134,"Hypocupremia associated with prior vitamin B12 deficiency","Prodan CI, Bottomley SS, Vincent AS, Cowan LD, Holland NR, Lind SE.","Am J Hematol. 2007 Apr	364	not relevant
16958314	16958314,"What is an adequate dose of oral vitamin B12 in older people with poor vitamin B12 status?","Park S, Johnson MA.","Nutr Rev. 2006 Aug	365	review
16930287	16930287,"Dorsal sural nerve conduction study in vitamin B(12) deficiency with megaloblastic anemia","Turgut B, Turgut N, Akpinar S, Balci K, Pamuk GE, Tekgündüz E, Demir M.","J Peripher Nerv Syst. 2006 Sep	366	Megaloblastic anema and nerve conduction studies in B12 deficiency
16895884	16895884,"Effect of oral vitamin B-12 with or without folic acid on cognitive function in older people with mild vitamin B-12 deficiency: a randomized, placebo-controlled trial","Eussen SJ, de Groot LC, Joosten LW, Bloo RJ, Clarke R, Ueland PM, Schneede J, Blom HJ, Hoefnagels WH, van Staveren WA.","Am J Clin Nutr. 2006 Aug	367	Effect of B12 on cog. Function RCT
16777759	16777759,"Homocysteine measurements in geriatric patients","Raeder S, Landaas S, Laake K, Lyberg T, Engedal K.","Scand J Clin Lab Invest. 2006	368	Primarily Homocysteine
16721255	16721255,"Pernicious anemia in Chinese: a study of 181 patients in a Hong Kong hospital","Chan JCW, Liu HSY, Kho BCS, Sim JPY, Lau TKH, Luk YW, Chu RW, Cheung FMF, Choi FPT, Ma ESK.","Medicine (Baltimore). 2006 May	369	Symptoms of P. anaemia
16716475	16716475,"Diagnosis of megaloblastic anaemias","Wickramasinghe SN.","Blood Rev. 2006 Nov	370	review
16614482	16614482,"Vitamin B12 and methionine synthesis: a critical review. Is nature's most beautiful cofactor misunderstood?","Toohey JI.","Biofactors. 2006	371	review
16596157	16596157,"Dose response effects of long-acting injectable vitamin B12 plus selenium (Se) on the vitamin B12 and Se status of ewes and their lambs","Grace ND, Knowles SO, West DM.","N Z Vet J. 2006 Apr	372	animals
16585128	16585128,"Oral vitamin B12 versus intramuscular vitamin B12 for vitamin B12 deficiency: a systematic review of randomized controlled trials","Butler CC, Vidal-Alaball J, Cannings-John R, McCaddon A, Hood K, Papaioannou A, Mcdowell I, Goringe A.","Fam Pract. 2006 Jun	373	Treatment oral vs. i.m B12 syst. Rev. (on biomarkers and symptoms)
16537043	16537043,"Diagnosis and management of clinical and subclinical cobalamin deficiency: advances and controversies","Carmel R, Sarrai M.","Curr Hematol Rep. 2006 Mar	374	review
16522380	16522380,"Vitamin B12 deficiency in patients with upper gastrointestinal symptoms in the Mekong Delta, Vietnam","v Nguyen T, van Oijen MG, Janssen MJ, Laheij RJ, Jansen JB, van Asten H.","Dig Liver Dis. 2006 Jun	375	Association of B12 deficiency in people with upper gastrointestinal symptoms
16461308	16461308,"The limited value of methylmalonic acid, homocysteine and holotranscobalamin in the diagnosis of early B12 deficiency","Goringe A, Ellis R, McDowell I, Vidal-Alaball J, Jenkins C, Butler C, Worwood M.","Haematologica. 2006 Feb	376	B12 treatment and improvement of hematology and clinical symptoms
16430460	16430460,"Current hematological findings in cobalamin deficiency. A study of 201 consecutive patients with documented cobalamin deficiency","Andrès E, Affenberger S, Zimmer J, Vinzio S, Grosu D, Pistol G, Maloisel F, Weitten T, Kaltenbach G, Blicklé JF.","Clin Lab Haematol. 2006 Feb	377	hematologic findings in B12 deficeincy
16404414	16404414,"Low maternal vitamin B12 status is associated with intrauterine growth retardation in urban South Indians","Muthayya S, Kurpad AV, Duggan CP, Bosch RJ, Dwarkanath P, Mhaskar A, Mhaskar R, Thomas A, Vaz M, Bhat S, Fawzi WW.","Eur J Clin Nutr. 2006 Jun	378	Maternal B12 and IUGR
16218195	16218195,"Vitamin B12 deficiency: a clinical and electrophysiological profile","Puri V, Chaudhry N, Goel S, Gulati P, Nehru R, Chowdhury D.","Electromyogr Clin Neurophysiol. 2005 Jul-Aug	379	neurology, electrophysiology, non-controlled treatment over 1 year
16194648	16194648,"Food-cobalamin malabsorption in elderly patients: clinical manifestations and treatment","Andrès E, Affenberger S, Vinzio S, Kurtz JE, Noel E, Kaltenbach G, Maloisel F, Schlienger JL, Blicklé JF.","Am J Med. 2005 Oct	380	Risk group: elderly
16189144	16189144,"Best practice in primary care pathology: review 1","Smellie WS, Wilson D, McNulty CA, Galloway MJ, Spickett GA, Finnigan DI, Bareford DA, Greig MA, Richards J.","J Clin Pathol. 2005 Oct	381	review
16184586	16184586,"Is induction of platelet recovery related to correction of cobalamin deficiency due to Helicobacter pylori eradication in ITP?","Kaptan K, Beyan C.","Am J Hematol. 2005 Oct	382	comment
16136044	16136044,"A pilot randomised controlled trial to reduce colorectal cancer risk markers associated with B-vitamin deficiency, insulin resistance and colonic inflammation","Bruce WR, Cirocco M, Giacca A, Kim YI, Marcon N, Minkin S.","Br J Cancer. 2005 Sep 19	383	not b12 alone
16109454	16109454,"Homocysteine and folate metabolism in depression","Bottiglieri T.","Prog Neuropsychopharmacol Biol Psychiatry. 2005 Sep	384	review
16033957	16033957,"Is testing for clinical cobalamin deficiency truly unreliable?","Carmel R.","Blood. 2005 Aug 1	385	review
16011607	16011607,"Atrophic tongue associated with Candida","Terai H, Shimahara M.","J Oral Pathol Med. 2005 Aug	386	not directly relevant
15939916	15939916,"Vitamin B12, homocysteine and carotid plaque in the era of folic acid fortification of enriched cereal grain products","Robertson J, Iemolo F, Stabler SP, Allen RH, Spence JD.","CMAJ. 2005 Jun 7	387	review
15883442	15883442,"Significant correlations of plasma homocysteine and serum methylmalonic acid with movement and cognitive performance in elderly subjects but no improvement from short-term vitamin therapy: a placebo-controlled randomized study","Lewerin C, Matousek M, Steen G, Johansson B, Steen B, Nilsson-Ehle H.","Am J Clin Nutr. 2005 May	388	not b12 alone
15856723	15856723,"Relationship of homocysteine, folic acid and vitamin B12 with depression in a middle-aged community sample","Sachdev PS, Parslow RA, Lux O, Salonikas C, Wen W, Naidoo D, Christensen H, Jorm AF.","Psychol Med. 2005 Apr	389	observational, not only B12
15805657	15805657,"Clinical and laboratory features and response to treatment in patients presenting with vitamin B12 deficiency-related neurological syndromes","Aaron S, Kumar S, Vijayan J, Jacob J, Alexander M, Gnanamuthu C.","Neurol India. 2005 Mar	390	Neurology, clinical and laboratory
15754489	15754489,"Vitamin B12 status and its association with Helicobacter pylori infection in alcohol dependent patients","van Oijen MG, Laheij RJ, de Jong CA, Peters WH, Jansen JB.","J Nutr Sci Vitaminol (Tokyo). 2004 Oct	391	observational
15720207	15720207,"The usefulness of holotranscobalamin in predicting vitamin B12 status in different clinical settings","Herrmann W, Obeid R, Schorr H, Geisel J.","Curr Drug Metab. 2005 Feb	392	purely biomarkers
15715686	15715686,"Holotranscobalamin--a first choice assay for diagnosing early vitamin B deficiency?","Hvas AM, Nexo E.","J Intern Med. 2005 Mar	393	purely biomarkers
15713991	15713991,"Increased serum CA-15.3 levels in patients with megaloblastic anemia due to vitamin B12 deficiency","Symeonidis A, Kouraklis-Symeonidis A, Apostolopoulos D, Arvanitopoulou E, Giannakoulas N, Vassilakos P, Zoumbos N.","Oncology. 2004	394	not relevant
15681626	15681626,"Neuropsychology of vitamin B12 deficiency in elderly dementia patients and control subjects","Osimani A, Berger A, Friedman J, Porat-Katz BS, Abarbanel JM.","J Geriatr Psychiatry Neurol. 2005 Mar	395	neuropsychatry in elederly people
15650554	15650554,"Is complete remission of cyclic thrombocytopenia related to correction of cobalamin deficiency due to H. pylori eradication?","Kaptan K, Beyan C.","Blood Coagul Fibrinolysis. 2005 Jan	396	comment
15640468	15640468,"Influence of cobalamin deficiency compared with that of cobalamin absorption on serum holo-transcobalamin II","Chen X, Remacha AF, Sardà MP, Carmel R.","Am J Clin Nutr. 2005 Jan	397	not conclusive with regard to biomarkers in PA
15485481	15485481,"A population-based intervention study on elevated serum levels of methylmalonic acid and total homocysteine in elderly people: results after 36 months of follow-up","Björkegren K, Svärdsudd K.","J Intern Med. 2004 Nov	398	Treatment not RCT 3 yeras with FA+B12, claimed searation of isolated B12 deficiency
15485461	15485461,"The relationship between serum cobalamin concentration and mean red cell volume at varying concentrations of serum folate","Metz J, McNeil AR, Levin M.","Clin Lab Haematol. 2004 Oct	399	folate & B12 interactions- not relevant
15466926	15466926,"Cobalamin-responsive disorders in the ambulatory care setting: unreliability of cobalamin, methylmalonic acid, and homocysteine testing","Solomon LR.","Blood. 2005 Feb 1	400	comment
15384478	15384478,"Vitamin B12 deficiency: issues in nursing care","Candela L, Meiner SE.","Medsurg Nurs. 2004 Aug	401	review
15305411	15305411,"Prevalence of vitamin B12 deficiency in patients with plasma cell dyscrasias: a retrospective review","Baz R, Alemany C, Green R, Hussein MA.","Cancer. 2004 Aug 15	402	not relevant/prevalence
15289425	15289425,"Vitamin B12 (cobalamin) deficiency in elderly patients","Andrès E, Loukili NH, Noel E, Kaltenbach G, Abdelgheni MB, Perrin AE, Noblet-Dick M, Maloisel F, Schlienger JL, Blicklé JF.","CMAJ. 2004 Aug 3	403	review
15259380	15259380,"Clinical utility of serum holotranscobalamin as a marker of cobalamin status in elderly patients with neuropsychiatric symptoms","Nilsson K, Isaksson A, Gustafson L, Hultberg B.","Clin Chem Lab Med. 2004	404	Neuropsychiatric symptoms and B12
15249607	15249607,"Copper deficiency myelopathy produces a clinical picture like subacute combined degeneration","Kumar N, Gross JB Jr, Ahlskog JE.","Neurology. 2004 Jul 13	405	not relevant
15131553	15131553,"Are hematinic deficiencies the cause of anemia in chronic heart failure?","Witte KK, Desilva R, Chattopadhyay S, Ghosh J, Cleland JG, Clark AL.","Am Heart J. 2004 May	406	Associations with heart failure/ no causal inference
15095047	15095047,"Orthostatic tolerance in older patients with vitamin B12 deficiency before and after vitamin B12 replacement","Moore A, Ryan J, Watts M, Pillay I, Clinch D, Lyons D.","Clin Auton Res. 2004 Apr	407	associations no causal inference
15044308	15044308,"Folic acid as ultimate in disease prevention: beware of vitamin B12 deficiency","Malnick S, Goland S.","BMJ. 2004 Mar 27	408	mainly folic acid
15006076	15006076,"Low serum vitamin B12 levels in an outpatient HIV-infected population","Hepburn MJ, Dyal K, Runser LA, Barfield RL, Hepburn LM, Fraser SL.","Int J STD AIDS. 2004 Feb	409	B12 in HIV- not much relevant
15003773	15003773,"A sequential study of visual evoked potential in patients with vitamin B12 deficiency neurological syndrome","Pandey S, Kalita J, Misra UK.","Clin Neurophysiol. 2004 Apr	410	Neurological Symptoms and B12
14985224	14985224,"Supplementation with [6S]-5-methyltetrahydrofolate or folic acid equally reduces plasma total homocysteine concentrations in healthy women","Lamers Y, Prinz-Langenohl R, Moser R, Pietrzik K.","Am J Clin Nutr. 2004 Mar	411	folate mainly
14963371	14963371,"Strategies for the laboratory diagnosis of some common causes of anaemia in elderly patients","Joosten E.","Gerontology. 2004 Mar-Apr	412	review
14749150	14749150,"Oral versus intramuscular cobalamin treatment in megaloblastic anemia: a single-center, prospective, randomized, open-label study","Bolaman Z, Kadikoylu G, Yukselen V, Yavasoglu I, Barutca S, Senturk T.","Clin Ther. 2003 Dec	413	B12 treatment oral versus im (RCT open label)
14656030	14656030,"Holotranscobalamin as a predictor of vitamin B12 status","Hvas AM, Nexo E.","Clin Chem Lab Med. 2003 Nov	414	purely biomarkers
14654277	14654277,"Nova Scotia moose mystery--a moose sickness related to cobalt- and vitamin B12 deficiency","Frank A, McPartlin J, Danielsson R.","Sci Total Environ. 2004 Jan 5	415	not relevant
14639569	14639569,"Prevalence of vitamin B12 deficiency in spinal cord injury","Petchkrua W, Burns SP, Stiens SA, James JJ, Little JW.","Arch Phys Med Rehabil. 2003 Nov	416	B12 in spinal cord injury
14628959	14628959,"Low cobalamin (vitamin B12) levels in multiple myeloma: a retrospective study","Vlasveld LT.","Neth J Med. 2003 Aug	417	association
14599154	14599154,"Health technology assessment in clinical biochemistry. Methylmalonic acid: a Danish showcase","Hvas AM, Ellegaard J, Lous J, Nexø E.","Scand J Clin Lab Invest. 2003	418	mainly focussed on costs, no clinical aspects
12975298	12975298,"Challenges in the identification of cobalamin-deficiency polyneuropathy","Saperstein DS, Wolfe GI, Gronseth GS, Nations SP, Herbelin LL, Bryan WW, Barohn RJ.","Arch Neurol. 2003 Sep	419	Neuropathy and B12
12960722	12960722,"The impact of B(12) treatment on gastric emptying time in patients with Helicobacter pylori infection","Gümürdülü Y, Serin E, Ozer B, Aydin M, Yapar AF, Kayaselçuk F, Yilmaz U, Boyacioğlu S.","J Clin Gastroenterol. 2003 Sep	420	B12 treatment in geriatric with H.pylori
12918012	12918012,"Vitamin B12 for cognition","Malouf R, Areosa Sastre A.","Cochrane Database Syst Rev. 2003	421	B12 treatment in oncology
12810156	12810156,"Urine methylmalonic acid measurements for the assessment of cobalamin deficiency related to neuropsychiatric disorders","Gültepe M, Ozcan O, Avşar K, Cetin M, Ozdemir AS, Gök M.","Clin Biochem. 2003 Jun	422	Prevalance in neuropsychiatric patients
12751548	12751548,"Toxicity of nitrous oxide","Weimann J.","Best Pract Res Clin Anaesthesiol. 2003 Mar	423	review
12720045	12720045,"Anemia, serum vitamin B12, and folic acid in patients with rheumatoid arthritis, psoriatic arthritis, and systemic lupus erythematosus","Segal R, Baumoehl Y, Elkayam O, Levartovsky D, Litinsky I, Paran D, Wigler I, Habot B, Leibovitz A, Sela BA, Caspi D.","Rheumatol Int. 2004 Jan	424	associations
12702963	12702963,"Gastric atrophy, metaplasia, and dysplasia: a clinical perspective","Kapadia CR.","J Clin Gastroenterol. 2003 May-Jun	425	review
12699478	12699478,"Intermediate effects of the ileocaecal urinary reservoir (Charleston pouch 1) on serum vitamin B12 concentrations: can vitamin B12 deficiency be prevented?","Yakout H, Bissada NK.","BJU Int. 2003 May	426	not relevant
12679831	12679831,"Prevalence and mechanisms of hyperhomocysteinemia in elderly hospitalized patients","Salles-Montaudon N, Parrot F, Balas D, Bouzigon E, Rainfray M, Emeriau JP.","J Nutr Health Aging. 2003	427	prevalance, biomarkers only
12650116	12650116,"Vitamin B12 deficiency. Recognizing subtle symptoms in older adults","Dharmarajan TS, Adiga GU, Norkus EP.","Geriatrics. 2003 Mar	428	review
12613142	12613142,"Vitamin B12 deficiency neurological syndromes: a clinical, MRI and electrodiagnostic study","Misra UK, Kalita J, Das A.","Electromyogr Clin Neurophysiol. 2003 Jan-Feb	429	Neurology clinical and electrophysiology
12611557	12611557,"The methionine-homocysteine cycle and its effects on cognitive diseases","Miller AL.","Altern Med Rev. 2003 Feb	430	review
12600857	12600857,"Comparison of the effect of low-dose supplementation with L-5-methyltetrahydrofolate or folic acid on plasma homocysteine: a randomized placebo-controlled study","Venn BJ, Green TJ, Moser R, Mann JI.","Am J Clin Nutr. 2003 Mar	431	mainely folate, not relevant
12552069	12552069,"Symptoms of B(12) deficiency can occur in women of childbearing age supplemented with folate","Stumpf DA.","Neurology. 2003 Jan 28	432	comment	Last article until 2003 (last 20 years)

## Sheet: Crude classification by topic
Inclusion and exclusion in the full text search stage
# count	PMID	Title	Internal # ID	Brief description of content					# count	PMID	Title	Internal # ID	Brief description of content					# Count	Neurological and neuropsychiatric symptoms /or objective measurements
	Hematological aspects and other commonly reported symptoms in B12 deficient people			Brief description of content	included					Identification of causes of B12 deficiency									Subacute combined spinal cord degeneration/spinal cord
1	33002395	33002395,"Oral Manifestations of Nutritional Deficiencies: Single Centre Analysis","Radochová V, Slezák R, Radocha J.","Acta Medica (Hradec Kralove). 2020	52	Oral lesion, associations	included				1	29190137	29190137,"HIGH-RISK GASTRIC PATHOLOGY AND PREVALENT AUTOIMMUNE DISEASES IN PATIENTS WITH PERNICIOUS ANEMIA","Hughes JW, Muegge BD, Tobin GS, Litvin M, Sun L, Saenz JB, Gyawali CP, McGill JB.","Endocr Pract. 2017 Nov	123	Identify and diagnose causes of B12 deficiency	included				1	36123908	36123908,"Clinical features of different stage subacute combined degeneration of the spinal cord","Linazi G, Abudureyimu S, Zhang J, Wulamu A, Maimaitiaili M, Wang B, Bakeer B, Xi Y.","Medicine (Baltimore). 2022 Sep 16	7	SCAD	included
2	32945532	32945532,"Clinical features of vitamin B12 deficiency mimicking thrombotic microangiopathy","Koshy AG, Freed JA.","Br J Haematol. 2020 Dec	54	hematologic manifestations of B12 deficiency; observational	included				2	24732991	24732991,"Patient journeys: diagnosis and treatment of pernicious anaemia","Hooper M, Hudson P, Porter F, McCaddon A.","Br J Nurs. 2014 Apr 10-23	209	Pernicious anemia diagnosis and treatment- Data from health register	included				2	33780172	33780172,"Prognostic indicators of subacute combined degeneration from B12 deficiency: A systematic review","Jhunjhnuwala D, Tanglay O, Briggs NE, Yuen MTY, Huynh W.","PM R. 2022 Apr	38	SCAD - Sys. Review	included
3	35790943	35790943,"Diagnostic value of oral ""beefy red"" patch combined with fingertip blood mean corpuscular volume in vitamin B12 deficiency","Xu X, Liu Y, Xiong X, Yao Y, Hu H, Jiang X, Meng W.","BMC Oral Health. 2022 Jul 5	12	Oral ulcer, beefy red patch, and MCV	included				3	22710370	22710370,"Clinical profiles, endoscopic and laboratory features and associated factors in patients with autoimmune gastritis","Soykan I, Yakut M, Keskin O, Bektaş M.","Digestion. 2012	260	Gastrointestinal tests to detect causes of malabsorption	included				3	33099331	33099331,"Correlation between anemia and clinical severity in subacute combined degeneration patients","Bi Z, Cao J, Shang K, Su Z, Xu S, Liu C.","J Clin Neurosci. 2020 Oct	50	SCAD and anemia	included
4	27234214	27234214,"Oral manifestations in vitamin B12 deficiency patients with or without history of gastrectomy","Kim J, Kim MJ, Kho HS.","BMC Oral Health. 2016 May 27	157	Oral manifestations of vitamin b12 deficiency	included				4	17042761	17042761,"Detection of early abnormalities in gastric function in first-degree relatives of patients with pernicious anemia","Juncà J, de Soria PL, Granada ML, Flores A, Márquez E.","Eur J Haematol. 2006 Dec	361	Abnormal gastric functions in familial forms of PA	included				4	32243408	32243408,"Is serum vitamin B12 decrease a necessity for the diagnosis of subacute combined degeneration?: A meta-analysis","Cao J, Xu S, Liu C.","Medicine (Baltimore). 2020 Apr	64	SCAD, admission B12 and anemia	included
5	25720915	25720915,"Impact of haematologic deficiencies on recurrent aphthous ulceration: a meta-analysis","Chen H, Sui Q, Chen Y, Ge L, Lin M.","Br Dent J. 2015 Feb	188	Association with mouth ulceration- meta-analysis	included				5	31714882	31714882,"High frequency of anti-parietal cell antibody (APCA) and intrinsic factor blocking antibody (IFBA) in individuals with severe vitamin B12 deficiency - an observational study in primary care patients","Salinas M, Flores E, López-Garrigós M, Leiva-Salinas C.","Clin Chem Lab Med. 2020 Feb 25	70	Gastric; causes of B12 malabsorption	included				5	29698962	29698962,"Subacute Combined Degeneration: A Retrospective Study of 68 Cases with Short-Term Follow-Up","Cao J, Su ZY, Xu SB, Liu CC.","Eur Neurol. 2018	108	SCAD and effect of B12 treatment	included
6	24164696	24164696,"Vitamin B12 and folate deficiency: should we use a different cutoff value for hematologic disorders?","Toprak B, Yalcın HZ, Colak A.","Int J Lab Hematol. 2014 Aug	227	low B12 and anemia and macrocytosis	included				6	21716160	21716160,"Diagnostic performance of serum cobalamin tests: a systematic review and meta-analysis","Willis CD, Elshaug AG, Milverton JL, Watt AM, Metz MP, Hiller JE	282	Syst. Review for use of B12 tests in diagnosis	included				6	26965759	26965759,"Conventional MRI for diagnosis of subacute combined degeneration (SCD) of the spinal cord due to vitamin B-12 deficiency","Xiao CP, Ren CP, Cheng JL, Zhang Y, Li Y, Li BB, Fan YZ.","Asia Pac J Clin Nutr. 2016	163	SCAD and therapy with B12	included
7	23400269	23400269,"A multicenter retrospective analysis of the clinical features of pernicious anemia in a Korean population","Song IC, Lee HJ, Kim HJ, Bae SB, Lee KT, Yang YJ, Park SY, Cho DY, Kim NY, Cho IS, Jo DY.","J Korean Med Sci. 2013 Feb	246	Pernicious anemia symptoms	included													7	26279228	26279228,"A retrospective study of 23 cases with subacute combined degeneration","Li J, Ren M, Dong A, Wu Y, Han N, Deng B, Bi X.","Int J Neurosci. 2016 Oct	180	SCAD not only due to B12 deficiency	included
8	20929023	20929023,"Vitamin B12 deficiency--a major cause of megaloblastic anaemia in patients attending a tertiary care hospital","Iqbal SP, Kakepoto GN, Iqbal SP.","J Ayub Med Coll Abbottabad. 2009 Jul-Sep	321	Megaloblastic anemia and B12 deficiency	included					Treatment with B12 in gastrointestinal disorders including cancers								8	24857760	24857760,"Prevalence of MR imaging abnormalities in vitamin B12 deficiency patients presenting with clinical features of subacute combined degeneration of the spinal cord","Jain KK, Malhotra HS, Garg RK, Gupta PK, Roy B, Gupta RK.","J Neurol Sci. 2014 Jul 15	207	SCAD Neurology and clinical symptoms	included
9	17474892	17474892,"Diagnostic clues to megaloblastic anaemia without macrocytosis","Chan CW, Liu SY, Kho CS, Lau KH, Liang YS, Chu WR, Ma SK.","Int J Lab Hematol. 2007 Jun	351	masking macrocytosis by thalassemia or iron deficiency	included				1	35120104	35120104,"Evaluation of the response to vitamin B12 supplementation in patients with atrophy in sleeve gastrectomy materials","Adalı Y, Binnetoğlu K.","Cir Cir. 2022	23	B12 treatment in pts with atrophy	included				9	24263693	24263693,"DTI correlates of cognition in conventional MRI of normal-appearing brain in patients with clinical features of subacute combined degeneration and biochemically proven vitamin B(12) deficiency","Gupta PK, Gupta RK, Garg RK, Rai Y, Roy B, Pandey CM, Malhotra HS, Narayana PA.","AJNR Am J Neuroradiol. 2014 May	222	SCAD treated with B12	included
10	16721255	16721255,"Pernicious anemia in Chinese: a study of 181 patients in a Hong Kong hospital","Chan JCW, Liu HSY, Kho BCS, Sim JPY, Lau TKH, Luk YW, Chu RW, Cheung FMF, Choi FPT, Ma ESK.","Medicine (Baltimore). 2006 May	369	Symptoms of P. anemia	included				2	33622624	33622624,"Vitamin B12 supplementation orally and intramuscularly in people with obesity undergoing gastric bypass","Ramos RJ, Mottin CC, Alves LB, Mulazzani CM, Padoin AV.","Obes Res Clin Pract. 2021 Mar-Apr	40	treatment in gastric bypass	included				10	22318813	22318813,"Sequential involvement of the nervous system in subacute combined degeneration","Minn YK, Kim SM, Kim SH, Kwon KH, Sunwoo IN.","Yonsei Med J. 2012 Mar	271	SCAD and low B12	included
11	16430460	16430460,"Current hematological findings in cobalamin deficiency. A study of 201 consecutive patients with documented cobalamin deficiency","Andrès E, Affenberger S, Zimmer J, Vinzio S, Grosu D, Pistol G, Maloisel F, Weitten T, Kaltenbach G, Blicklé JF.","Clin Lab Haematol. 2006 Feb	377	hematologic findings in B12 deficiency	included				3	29318504	29318504,"Oral Vitamin B(12) Supplementation After Roux-en-Y Gastric Bypass: a Systematic Review","Mahawar KK, Reid A, Graham Y, Callejas-Diaz L, Parmar C, Carr WR, Jennings N, Singhal R, Small PK.","Obes Surg. 2018 Jul	120	treatment oral B12 after gastric bypass- syst review	included				11	19153635	19153635,"Bladder dysfunction in subacute combined degeneration: a clinical, MRI and urodynamic study","Misra UK, Kalita J, Kumar G, Kapoor R.","J Neurol. 2008 Dec	325	SCAD: and symptom reversibility after B12 treatment	included
									4	27838841	27838841,"Different Supplementation Regimes to Treat Perioperative Vitamin B12 Deficiencies in Bariatric Surgery: a Systematic Review","Smelt HJ, Pouwels S, Smulders JF.","Obes Surg. 2017 Jan	147	Suppl. B12 and bariatric surgery	included				12	14639569	14639569,"Prevalence of vitamin B12 deficiency in spinal cord injury","Petchkrua W, Burns SP, Stiens SA, James JJ, Little JW.","Arch Phys Med Rehabil. 2003 Nov	416	B12 in spinal cord injury	study prevalence of abnormal MMA and tHcy and identify their association with age and spinal cord injury or diseases characteristics	0
									5	27146501	27146501,"Comparison Between Different Intramuscular Vitamin B(12) Supplementation Regimes: a Retrospective Matched Cohort Study","Smelt HJ, Pouwels S, Said M, Berghuis KA, Boer AK, Smulders JF.","Obes Surg. 2016 Dec	159	B12 treatment in bariatric surgery	included										0
	Risk groups		Internal # ID	Brief description of content					6	25270794	25270794,"Effectiveness of B vitamin supplementation following bariatric surgery: rapid increases of serum vitamin B12","Moore CE, Sherman V.","Obes Surg. 2015 Apr	202	Treatment of B12 after bariatric surgery	included					Nitrous oxide toxicity- signs and symptoms					0
	Risk group diabetes, metformin and obesity								7	24091055	24091055,"Vitamin B12 deficiency in patients undergoing bariatric surgery: preventive strategies and key recommendations","Majumder S, Soriano J, Louie Cruz A, Dasanu CA.","Surg Obes Relat Dis. 2013 Nov-Dec	232	Treatment in bariatric surgery- sys. Rev	included				13	31625167	31625167,"Vitamin B(12) supplementation futile for preventing demyelination in ongoing nitrous oxide misuse","Blair C, Tremonti C, Edwards L, Haber PS, Halmagyi GM.","Med J Aust. 2019 Nov	76	Nitrous oxide and B12 treatment (potentially relevant)	Exclude: nitric oxide	0
1	27130885	27130885,"Association between metformin and vitamin B(12) deficiency in patients with type 2 diabetes: A systematic review and meta-analysis","Chapman LE, Darling AL, Brown JE.","Diabetes Metab. 2016 Nov	160	Risk group: metformin & diabetes- systematic review	included				8	21556950	21556950,"Oral vitamin B12 replacement: an effective treatment for vitamin B12 deficiency after total gastrectomy in gastric cancer patients","Kim HI, Hyung WJ, Song KJ, Choi SH, Kim CB, Noh SH.","Ann Surg Oncol. 2011 Dec	290	Treatment- single arm study	included				14	30611595	30611595,"Recreational nitrous oxide abuse related subacute combined degeneration of the spinal cord in adolescents - A case series and literature review","Lan SY, Kuo CY, Chou CC, Kong SS, Hung PC, Tsai HY, Chen YC, Lin JJ, Chou IJ, Lin KL	92	Nitrous oxide and B12 treatment (symptoms reversibility)	Exclude: nitric oxide	0
2	273552	27355231,"Sublingual vitamin B12 compared to intramuscular injection in patients with type 2 diabetes treated with metformin: a randomised trial","Parry-Strong A, Langdana F, Haeusler S, Weatherall M, Krebs J.","N Z Med J. 2016 Jun 10	154	Risk group: metformin and B12 treatment- Prevention	included				9	12960722	12960722,"The impact of B(12) treatment on gastric emptying time in patients with Helicobacter pylori infection","Gümürdülü Y, Serin E, Ozer B, Aydin M, Yapar AF, Kayaselçuk F, Yilmaz U, Boyacioğlu S.","J Clin Gastroenterol. 2003 Sep	420	B12 treatment in geriatric with H.pylori	included				15	35307992	35307992,"Analysis of clinical characteristics and prognostic factors in 110 patients with nitrous oxide abuse","Yu M, Qiao Y, Li W, Fang X, Gao H, Zheng D, Ma Y.","Brain Behav. 2022 Apr	21	Neurology, Nitrous oxide	Exclude: nitric oxide	0
3	275136	27513580,"Multivitamin Use and Serum Vitamin B12 Concentrations in Older-Adult Metformin Users in REGARDS, 2003-2007","Kancherla V, Garn JV, Zakai NA, Williamson RS, Cashion WT, Odewole O, Judd SE, Oakley GP Jr.","PLoS One. 2016 Aug 11	151	Risk group: metformin use	included													16	35253567	35253567,"Nitrous oxide abuse induced subacute combined degeneration despite patient initiated B12 supplementation","Temple C, Horowitz BZ.","Clin Toxicol (Phila). 2022 Jul	22	Neurology, Nitrous oxide	Exclude: nitric oxide	0
4	31067706	31067706,"Monitoring Vitamin B(12) in Women Treated with Metformin for Primary Prevention of Breast Cancer and Age-Related Chronic Diseases","Mastroianni A, Ciniselli CM, Panella R, Macciotta A, Cavalleri A, Venturelli E, Taverna F, Mazzocchi A, Bruno E, Muti P, Berrino F, Verderio P, Morelli D, Pasanisi P.","Nutrients. 2019 May 7	83	Risk group: metformin use	included					Treatment with B12 and route of adminstration								17	34775689	34775689,"Clinical epidemiological characteristics of nitrous oxide abusers: A single-center experience in a hospital in China","Li Y, Dong J, Xu R, Feng F, Kan W, Ding H, Wang X, Chen Y, Wang X, Zhu S, Dong R.","Brain Behav. 2021 Dec	26	Neurology, Nitrous oxide	Exclude: nitric oxide	0
5	32448786	32448786,"Association of vitamin B(12) deficiency in people with type 2 diabetes on metformin and without metformin: a multicenter study, Karachi, Pakistan","Miyan Z, Waris N	61	Risk group: metformin use	included				10	33601391	33601391,"Enteral Vitamin B12 Supplementation Is Effective for Improving Anemia in Patients Who Underwent Total Gastrectomy","Namikawa T, Maeda M, Yokota K, Iwabu J, Munekage M, Uemura S, Maeda H, Kitagawa H, Kobayashi M, Hanazaki K.","Oncology. 2021	41	treatment oral vs. i.m	included				18	34758196	34758196,"Nitrous oxide-related neurological disorders: Clinical, laboratory, neuroimaging, and electrophysiological findings","Jiang J, Shang X, Wang X, Chen H, Li W, Wang Y, Xu J.","Brain Behav. 2021 Dec	27	Neurology, Nitrous oxide	Exclude: nitric oxide	0
6	30317438	30317438,"Prevalence of vitamin B(12) deficiency in South Indians with different grades of glucose tolerance","Jayashri R, Venkatesan U, Rohan M, Gokulakrishnan K, Shanthi Rani CS, Deepa M, Anjana RM, Mohan V, Pradeepa R.","Acta Diabetol. 2018 Dec	97	Risk group: diabetes and pre-diabetes	included				11	32819927	32819927,"Oral versus intramuscular administration of vitamin B12 for vitamin B12 deficiency in primary care: a pragmatic, randomised, non-inferiority clinical trial (OB12)","Sanz-Cuesta T, Escortell-Mayor E, Cura-Gonzalez I, Martin-Fernandez J, Riesgo-Fuertes R, Garrido-Elustondo S, Mariño-Suárez JE, Álvarez-Villalba M, Gómez-Gascón T, González-García I, González-Escobar P, Vargas-Machuca Cabañe…	55	treatment oral vs. i.m	included				19	34427020	34427020,"Nitrous oxide-induced myeloneuropathy","Swart G, Blair C, Lu Z, Yogendran S, Offord J, Sutherland E, Barnes S, Palavra N, Cremer P, Bolitho S, Michael Halmagyi G.","Eur J Neurol. 2021 Dec	32	Myeloneuropathy and Nitrous oxide	Exclude: nitric oxide	0
7	29352218	29352218,"Nutritional deficiencies and bone metabolism after endobarrier in obese type 2 patients with diabetes","Vilarrasa N, Fabregat A, Toro S, Gordejuela AG, Casajoana A, Montserrat M, Garrido P, López-Urdiales R, Virgili N, Planas-Vilaseca A, Simó-Servat A, Pujol J.","Eur J Clin Nutr. 2018 Oct	119	Risk group: obese type 2 diabetes	included				12	29543316	29543316,"Oral vitamin B(12) versus intramuscular vitamin B(12) for vitamin B(12) deficiency","Wang H, Li L, Qin LL, Song Y, Vidal-Alaball J, Liu TH.","Cochrane Database Syst Rev. 2018 Mar 15	115	treatment oral vs. i.m	included				20	34245346	34245346,"A rise in cases of nitrous oxide abuse: neurological complications and biological findings","Einsiedler M, Voulleminot P, Demuth S, Kalaaji P, Bogdan T, Gauer L, Reschwein C, Nadaj-Pakleza A, de Sèze J, Kremer L, Schroder I, Bigaut K.","J Neurol. 2022 Feb	33	Neurology, Nitrous oxide	Exclude: nitric oxide	0
8	26900641	26900641,"Long-term Metformin Use and Vitamin B12 Deficiency in the Diabetes Prevention Program Outcomes Study","Aroda VR, Edelstein SL, Goldberg RB, Knowler WC, Marcovina SM, Orchard TJ, Bray GA, Schade DS, Temprosa MG, White NH, Crandall JP	166	Risk group: metformin and diabetes	included				13	22650964	22650964,"Oral versus intramuscular administration of vitamin B12 for the treatment of patients with vitamin B12 deficiency: a pragmatic, randomised, multicentre, non-inferiority clinical trial undertaken in the primary healthcare setting (Project OB12)","Sanz-Cuesta T, González-Escobar P, Riesgo-Fuertes R, Garrido-Elustondo S, del Cura-González I, Martín-Fernández J, Escortell-Mayor E, Rodríguez…	264	Treatment with B12 oral vs. i.m	study plan				21	30144777	30144777,"Subacute combined degeneration of the spinal cord following nitrous oxide anesthesia: A systematic review of cases","Patel KK, Mejia Munne JC, Gunness VRN, Hersey D, Alshafai N, Sciubba D, Nasser R, Gimbel D, Cheng J, Nouri A.","Clin Neurol Neurosurg. 2018 Oct	99	SCAD and nitrous oxide- systematic review of cases	Exclude: nitric oxide	0
9	28882470	28882470,"An observational study of vitamin b12 levels and peripheral neuropathy profile in patients of diabetes mellitus on metformin therapy","Gupta K, Jain A, Rohatgi A.","Diabetes Metab Syndr. 2018 Jan-Mar	128	At risk group: pts with diabetes using metformin	included				14	21600388	21600388,"Comparing the efficacy and tolerability of a new daily oral vitamin B12 formulation and intermittent intramuscular vitamin B12 in normalizing low cobalamin levels: a randomized, open-label, parallel-group study","Castelli MC, Friedman K, Sherry J, Brazzillo K, Genoble L, Bhargava P, Riley MG.","Clin Ther. 2011 Mar	284	RCT-open label 2 B12 preparations	included										0
10	28283394	28283394,"The study of association of Vitamin B(12) deficiency in type 2 diabetes mellitus with and without diabetic nephropathy in North Indian Population","Bherwani S, Ahirwar AK, Saumya AS, Sandhya AS, Prajapat B, Patel S, Jibhkate SB, Singh R, Ghotekar LH.","Diabetes Metab Syndr. 2017 Nov	138	Risk group: diabetes	included				15	20088746	20088746,"Efficacy of oral cobalamin (vitamin B12) therapy","Andrès E, Fothergill H, Mecili M.","Expert Opin Pharmacother. 2010 Feb	314	Syst. Rev. Treatment with oral B12	included				22	21553339	21553339,"Dual pathology as a result of spinal stenosis and vitamin B12 deficiency","Patel MS, Rasul Z, Sell P.","Eur Spine J. 2011 Dec	291	Elderly people with spinal stenosis (hospital archive)	based on hospital records and B12 deficiency was defined based on serum B12 only, some patients were taking supplements, but data quality is low to very low	0
11	28182265	28182265,"Long-term Metformin Therapy and Monitoring for Vitamin B12 Deficiency Among Older Veterans","Kancherla V, Elliott JL Jr, Patel BB, Holland NW, Johnson TM 2nd, Khakharia A, Phillips LS, Oakley GP Jr, Vaughan CP.","J Am Geriatr Soc. 2017 May	140	Risk group: metformin use	included				16	16585128	16585128,"Oral vitamin B12 versus intramuscular vitamin B12 for vitamin B12 deficiency: a systematic review of randomized controlled trials","Butler CC, Vidal-Alaball J, Cannings-John R, McCaddon A, Hood K, Papaioannou A, Mcdowell I, Goringe A.","Fam Pract. 2006 Jun	373	Treatment oral vs. i.m B12 syst. Rev. (on biomarkers and symptoms)	included										0
12	26914484	26914484,"Vitamin B12 screening in metformin-treated diabetics in primary care: were elderly patients less likely to be tested?","Fogelman Y, Kitai E, Blumberg G, Golan-Cohen A, Rapoport M, Carmeli E.","Aging Clin Exp Res. 2017 Apr	164	Risk group: metformin and diabetes	included				17	14749150	14749150,"Oral versus intramuscular cobalamin treatment in megaloblastic anemia: a single-center, prospective, randomized, open-label study","Bolaman Z, Kadikoylu G, Yukselen V, Yavasoglu I, Barutca S, Senturk T.","Clin Ther. 2003 Dec	413	B12 treatment oral versus im (RCT open label)	included		0.01			Neuropsychiatric aspects					0
13	25486369	25486369,"Vitamin B12 in obese adolescents with clinical features of insulin resistance","Ho M, Halim JH, Gow ML, El-Haddad N, Marzulli T, Baur LA, Cowell CT, Garnett SP.","Nutrients. 2014 Dec 4	194	Risk group: obese type 2 diabetes	included											0.01		23	15681626	15681626,"Neuropsychology of vitamin B12 deficiency in elderly dementia patients and control subjects","Osimani A, Berger A, Friedman J, Porat-Katz BS, Abarbanel JM.","J Geriatr Psychiatry Neurol. 2005 Mar	395	neuropsychatry in elederly people	included	0
14	25331307	25331307,"The prevalence of low vitamin B12 status in people with type 2 diabetes receiving metformin therapy in New Zealand--a clinical audit","Haeusler S, Parry-Strong A, Krebs JD.","N Z Med J. 2014 Oct 17	196	Risk group: metformin	included					Treatment and hematological or clinical response						0.01		24	12810156	12810156,"Urine methylmalonic acid measurements for the assessment of cobalamin deficiency related to neuropsychiatric disorders","Gültepe M, Ozcan O, Avşar K, Cetin M, Ozdemir AS, Gök M.","Clin Biochem. 2003 Jun	422	Prevalance in neuropsychiatric patients	development of analytical method to measure MMA in patients with psychiatric disorders- not relevant to the present search	0
15	25299054	25299054,"Higher prevalence of metformin-induced vitamin B12 deficiency in sulfonylurea combination compared with insulin combination in patients with type 2 diabetes: a cross-sectional study","Kang D, Yun JS, Ko SH, Lim TS, Ahn YB, Park YM, Ko SH.","PLoS One. 2014 Oct 9	199	Risk group: metfromin & diabetes	included				18	32798344	32798344,"Assessment of Reference Range of Serum Homocysteine from the Post-therapy Values of Cobalamin and Folate Deficiency Patients","Chandrasekhar C, Kiranmayi VS, Pasupuleti SK, Sarma KV, Sarma PV.","J Assoc Physicians India. 2020 Sep	57	treatment, reversible clinical symptoms	included		0.01		25	15259380	15259380,"Clinical utility of serum holotranscobalamin as a marker of cobalamin status in elderly patients with neuropsychiatric symptoms","Nilsson K, Isaksson A, Gustafson L, Hultberg B.","Clin Chem Lab Med. 2004	404	Neuropsychiatric symptoms and B12	Biomarker based- evaluated the clinical value of holoTC and other biomarkers in a group of psychogeriatric patients (no controls)	0
16	24346380	24346380,"Association of B12 deficiency and clinical neuropathy with metformin use in type 2 diabetes patients","Singh AK, Kumar A, Karmakar D, Jha RK.","J Postgrad Med. 2013 Oct-Dec	218	Risk group: metfromin & diabetes & neuropathy	included				19	33126294	33126294,"Lingual Linear Lesions: A Clinical Sign Strongly Suggestive of Severe Vitamin B(12) Deficiency","Bao ZX, Yang XW, Fang DD.","Nutr Clin Pract. 2021 Oct	48	oral lesion, B12 treatment	included		0.01		26	24522476	24522476,"Older adult psychiatric inpatients with non-cognitive disorders should be screened for vitamin B12 deficiency","Lachner C, Martin C, John D, Nekkalapu S, Sasan A, Steinle N, Regenold WT.","J Nutr Health Aging. 2014	213	Risk group: elderly with psychiatric disorders	included	0
17	21940283	21940283,"Effect of metformin therapy on vitamin D and vitamin B₁₂ levels in patients with type 2 diabetes mellitus","Kos E, Liszek MJ, Emanuele MA, Durazo-Arvizu R, Camacho P.","Endocr Pract. 2012 Mar-Apr	280	Risk group: Metformin	included				20	30887907	30887907,"Characteristics of patients with vitamin B12-responsive neuropathy: a case series with systematic repeated electrophysiological assessment","Franques J, Chiche L, De Paula AM, Grapperon AM, Attarian S, Pouget J, Mathis S.","Neurol Res. 2019 Jun	87	Small study, neuropathy, treatment, no control	included		0.01		27	29663261	29663261,"Evaluation of diffusion tensor imaging changes and neurocognitive effects of asymptomatic vitamin B12 deficiency","Tak AZA, Dayan E, Bulut HT.","Acta Neurol Belg. 2018 Jun	110	Neurocognition and latent B12 deficiency	included	0
18	22069468	22069468,"Status of B-vitamins and homocysteine in diabetic retinopathy: association with vitamin-B12 deficiency and hyperhomocysteinemia","Satyanarayana A, Balakrishna N, Pitla S, Reddy PY, Mudili S, Lopamudra P, Suryanarayana P, Viswanath K, Ayyagari R, Reddy GB.","PLoS One. 2011	277	Risk group: diabetes	included				21	25708265	25708265,"Assessment of functional and structural damage in brain parenchyma in patients with vitamin B12 deficiency: A longitudinal perfusion and diffusion tensor imaging study","Roy B, Trivedi R, Garg RK, Gupta PK, Tyagi R, Gupta RK.","Magn Reson Imaging. 2015 Jun	190	B12 treatment and subclinical neurological outcome	included		0.01		28	19464701	19464701,"Cumulative incidence of vitamin B12 deficiency in patients with Alzheimer disease","Prodan CI, Cowan LD, Stoner JA, Ross ED.","J Neurol Sci. 2009 Sep 15	323	Risk group: patients with Alzheimer disease	included	0
19	20488910	20488910,"Long term treatment with metformin in patients with type 2 diabetes and risk of vitamin B-12 deficiency: randomised placebo controlled trial","de Jager J, Kooy A, Lehert P, Wulffelé MG, van der Kolk J, Bets D, Verburg J, Donker AJ, Stehouwer CD.","BMJ. 2010 May 20	306	Risk group: metformin	included				22	24379897	24379897,"Vitamin B12 and cognitive function: an evidence-based analysis","Health Quality Ontario.","Ont Health Technol Assess Ser. 2013 Nov 1	216	Treatment B12, dementia: syst. Review	included		0.01		29	19171834	19171834,"Biochemical indicators of vitamin B12 and folate insufficiency and cognitive decline","Tangney CC, Tang Y, Evans DA, Morris MC.","Neurology. 2009 Jan 27	324	Risk group: elderly and cog. Decline	included	0
20	19734399	19734399,"The prevalence of vitamin B(12) deficiency in patients with type 2 diabetes: a cross-sectional study","Pflipsen MC, Oh RC, Saguil A, Seehusen DA, Seaquist D, Topolski R.","J Am Board Fam Med. 2009 Sep-Oct	317	Risk group: diabetes	included				23	23262189	23262189,"Laboratory evaluation for vitamin B12 deficiency: the case for cascade testing","Berg RL, Shaw GR.","Clin Med Res. 2013 Feb	251	B12 treatment and clinical improvement	A retrospective study, electronic medical records of 192 patients on i.m B12 and searched for clinical response	n	0.01								0
21	17030830	17030830,"Risk factors of vitamin B(12) deficiency in patients receiving metformin","Ting RZ, Szeto CC, Chan MH, Ma KK, Chow KM.","Arch Intern Med. 2006 Oct 9	362	Risk group: metformin use	included				24	22781060	22781060,"A study of neurobehavioral, clinical psychometric, and P3 changes in vitamin B12 deficiency neurological syndrome","Kalita J, Agarwal R, Chandra S, Misra UK.","Nutr Neurosci. 2013 Jan	258	B12 treatment and neurological symptoms	included		0.01			Neuropathy, neurology (incl. response to treatment)					0
									25	16461308	16461308,"The limited value of methylmalonic acid, homocysteine and holotranscobalamin in the diagnosis of early B12 deficiency","Goringe A, Ellis R, McDowell I, Vidal-Alaball J, Jenkins C, Butler C, Worwood M.","Haematologica. 2006 Feb	376	B12 treatment and improvement of hematology and clinical symptoms	included		0.01			Neuropathy or clinical symptoms mainly neurological					0
	Risk group gastrointestinal disorders								26	21426888	21426888,"Parenteral vitamin B12 in macrocytic hemodialysis patients reduced MMA levels but did not change mean red cell volume or hemoglobin","Su VC, Shalansky K, Jastrzebski J, Martyn A, Li G, Yeung CK, Snyder F, Zalunardo N.","Clin Nephrol. 2011 Apr	295	B12 treatment in macrocytic hemodialysis patients	included		0.01		30	25710280	25710280,"Vitamin B12-responsive neuropathies: A case series","Solomon LR.","Nutr Neurosci. 2016 May	189	Neuropathy: treated with B12 and followed up- no control intervention	included	0
22	36697109	36697109,"Clinical Course of Vitamin B12 Deficiency and Associated Risk Factors in Patients After Total Gastrectomy for Gastric Cancer","Aoyama T, Hara K, Maezawa Y, Kazama K, Hashimoto I, Sawazaki S, Komori K, Tamagawa H, Tamagawa A, Kano K, Cho H, Morita J, Segami K, Ishimoto M, Oshima T, Yukawa N, Rino Y.","Anticancer Res. 2023 Feb	1	clinical course after gastrectomy	included											0.01		31	23998863	23998863,"Vitamin B12 deficiency in India: mean corpuscular volume is an unreliable screening parameter","Bhatia P, Kulkarni JD, Pai SA.","Natl Med J India. 2012 Nov-Dec	234	Deficiency symptoms, clinical picture, blood smear	included	0
23	35896261	35896261,"Phase II Study of a Multi-center Randomized Controlled Trial to Evaluate Oral Vitamin B12 Treatment for Vitamin B12 Deficiency After Total Gastrectomy in Gastric Cancer Patients","Aoyama T, Maezawa Y, Cho H, Saigusa Y, Tamura J, Tsuchida K, Komori K, Kano K, Segami K, Hara K, Senuki K, Suzuki Y, Yamakawa M, Tamagawa H, Oshima T, Yukawa N, Rino Y.","Anticancer Res. 2022 Aug	9	Total Gastrectomy in gastric cancer	included				27	18925978	18925978,"Cognitive and psychiatric effects of vitamin B12 replacement in dementia with low serum B12 levels: a nursing home study","van Dyck CH, Lyness JM, Rohrbaugh RM, Siegal AP.","Int Psychogeriatr. 2009 Feb	330	effects of B12 replacement on cognitive and psychiatric symptoms	included		0.01		32	34693890	34693890,"Clinical relevance of testing for metabolic vitamin B12 deficiency in patients with polyneuropathy","Warendorf JK, van Doormaal PTC, Vrancken AFJE, Verhoeven-Duif NM, van Eijk RPA, van den Berg LH, Notermans NC.","Nutr Neurosci. 2022 Dec	29	Neuropathy and B12 treatment	included	0
24	32805133	32805133,"Three-Year Outcomes of Bariatric Surgery in Patients With Obesity and Hypertension : A Randomized Clinical Trial","Schiavon CA, Bhatt DL, Ikeoka D, Santucci EV, Santos RN, Damiani LP, Oliveira JD, Machado RHV, Halpern H, Monteiro FLJ, Noujaim PM, Cohen RV, de Souza MG, Amodeo C, Bortolotto LA, Berwanger O, Cavalcanti AB, Drager LF.","Ann Intern Med. 2020 Nov 3	56	bariatric surgery, low B12 (low relevance)	included				28	17561285	17561285,"Vitamin B(12) supplementation did not improve cognition but reduced delirium in demented patients with vitamin B(12) deficiency","Kwok T, Lee J, Lam L, Woo J.","Arch Gerontol Geriatr. 2008 May-Jun	349	Effect of B12 suppl. On cognition, delirium in demented elderly	included		0.01		33	31603875	31603875,"Vitamin B12 status and peripheral neuropathy in patients with type 2 diabetes mellitus","Khalaf KM, Khudhair MS, Ashor AW.","J Pak Med Assoc. 2019 Aug	77	Neuropathy, diabetes and metformin	included	0
25	29903686	29903686,"Do specialized bariatric multivitamins lower deficiencies after RYGB?","Schijns W, Schuurman LT, Melse-Boonstra A, van Laarhoven CJHM, Berends FJ, Aarts EO.","Surg Obes Relat Dis. 2018 Jul	104	Risk group: bariatric surgery	included				29	16895884	16895884,"Effect of oral vitamin B-12 with or without folic acid on cognitive function in older people with mild vitamin B-12 deficiency: a randomized, placebo-controlled trial","Eussen SJ, de Groot LC, Joosten LW, Bloo RJ, Clarke R, Ueland PM, Schneede J, Blom HJ, Hoefnagels WH, van Staveren WA.","Am J Clin Nutr. 2006 Aug	367	Effect of B12 on cog. Function RCT	included		0.01		34	29052170	29052170,"The histopathological evaluation of small fiber neuropathy in patients with vitamin B12 deficiency","Güneş HN, Bekircan-Kurt CE, Tan E, Erdem-Özdamar S.","Acta Neurol Belg. 2018 Sep	124	Neuropathy in patients with B12 deficiency- potentially relevant	included	0
26	30231804	30231804,"Anemia following Roux-en-Y gastric bypass for morbid obesity	98	Risk group-gastric bypass: suppl with multivit.+ B12- no deficiency developed within 5 years follow up	included				30	12918012	12918012,"Vitamin B12 for cognition","Malouf R, Areosa Sastre A.","Cochrane Database Syst Rev. 2003	421	B12 treatment and cognition	included		0.01		35	26630935	26630935,"Correlation of Tc-99 m ethyl cysteinate dimer single-photon emission computed tomography and clinical presentations in patients with low cobalamin status","Tu MC, Lo CP, Chen CY, Huang CF.","BMC Neurol. 2015 Dec 3	171	Clinical manifestations of B12 deficiency- mostly neuropsychiatric	included	0
27	32444241	32444241,"Medium term post-bariatric surgery deficit of vitamin B12 is predicted by deficit at time of surgery","Antoine D, Li Z, Quilliot D, Sirveaux MA, Meyre D, Mangeon A, Brunaud L, Guéant JL, Guéant-Rodriguez RM.","Clin Nutr. 2021 Jan	62	Risk group: postbariatric surgery	included				31	26821156	26821156,"Phase II study of oral vitamin B12 supplementation as an alternative to intramuscular injection for patients with non-small cell lung cancer undergoing pemetrexed therapy","Takagi Y, Hosomi Y, Nagamata M, Watanabe K, Takahashi S, Nakahara Y, Yomota M, Sunami K, Okuma Y, Shimokawa T, Okamura T.","Cancer Chemother Pharmacol. 2016 Mar	169	Treatment with B12 in pts with pemetrexed	included		0.01		36	26624211	26624211,"Examining the Association between Vitamin B12 Deficiency and Dementia in High-Risk Hospitalized Patients","Siswanto O, Smeall K, Watson T, Donnelly-Vanderloo M, O'Connor C, Foley N, Madill J.","J Nutr Health Aging. 2015 Dec	172	association of B12 with dementia in B12 in high risk hospitalized patients	included	0
28	22684818	22684818,"Nutritional profile of patients before and after Roux-en-Y gastric bypass: 3-year follow-up","Blume CA, Boni CC, Casagrande DS, Rizzolli J, Padoin AV, Mottin CC.","Obes Surg. 2012 Nov	262	Gastric bypass on B12 supplements for 3 years	included											0.01		37	25438485	25438485,"Neurological manifestations of B(12) deficiency with emphasis on its aetiology","Divate PG, Patanwala R.","J Assoc Physicians India. 2014 May	195	Neurological aspects of PA, manifestations	included	0
29	18214631	18214631,"Prevalence of iron, folate, and vitamin B12 deficiency anemia after laparoscopic Roux-en-Y gastric bypass","Vargas-Ruiz AG, Hernández-Rivera G, Herrera MF.","Obes Surg. 2008 Mar	341	Risk group: gastric bypass and B12 deficiency	included					Other aspects of treatment						0.01		38	24322997	24322997,"Diffusion tensor tractography and neuropsychological assessment in patients with vitamin B12 deficiency","Gupta PK, Garg RK, Gupta RK, Malhotra HS, Paliwal VK, Rathore RK, Verma R, Singh MK, Rai Y, Pandey CM.","Neuroradiology. 2014 Feb	219	Neurological tests -pre-post	included	0
30	25309981	25309981,"Updated features associated with type 1 gastric carcinoids patients: a single-center study","Lahner E, Galli G, Esposito G, Pilozzi E, Corleto VD, Annibale B.","Scand J Gastroenterol. 2014 Dec	198	Risk group: gastric cancer	included				32	23236022	23236022,"A vitamin B-12 supplement of 500 μg/d for eight weeks does not normalize urinary methylmalonic acid or other biomarkers of vitamin B-12 status in elderly people with moderately poor vitamin B-12 status","Hill MH, Flatley JE, Barker ME, Garner CM, Manning NJ, Olpin SE, Moat SJ, Russell J, Powers HJ.","J Nutr. 2013 Feb	254	B12 treatment and biomarker response	Based only on biomarker and normalization of biomarkers - no clinical tests		0.01		39	23708236	23708236,"Indications for cobalamin level assessment in departments of internal medicine: a prospective practice survey","Chiche L, Mancini J, Arlet JB	239	Medical Practice: indications for B12 assessment in an internal medicine Department France	included	0
31	25296737	25296737,"The changing of serum vitamin B12 and homocysteine levels after gastrectomy in patients with gastric cancer: do they associate with clinicopathological factors?","Bilici A, Sonkaya A, Ercan S, Ustaalioglu BB, Seker M, Aliustaoglu M, Orcun A, Gumus M.","Tumour Biol. 2015 Feb	200	Risk group: gastrectomy in gastric cancer	included				33	29499976	29499976,"Effect of two different sublingual dosages of vitamin B(12) on cobalamin nutritional status in vegans and vegetarians with a marginal deficiency: A randomized controlled trial","Del Bo' C, Riso P, Gardana C, Brusamolino A, Battezzati A, Ciappellano S.","Clin Nutr. 2019 Apr	116	treatment RCT high dose B12 in vegans	Based only on biomarker and normalization of biomarkers - no clinical tests (welness marker is not a widely used test!)		0.01		40	23686033	23686033,"Vitamin B₁₂ levels and psychiatric symptomatology: a case series","Jayaram N, Rao MG, Narasimha A, Raveendranathan D, Varambally S, Venkatasubramanian G, Gangadhar BN.","J Neuropsychiatry Clin Neurosci. 2013 Spring	240	Psychiatric symptoms- case series	included	0
32	24096753	24096753,"Vitamin B(12) deficiency after gastrectomy for gastric cancer: an analysis of clinical patterns and risk factors","Hu Y, Kim HI, Hyung WJ, Song KJ, Lee JH, Kim YM, Noh SH.","Ann Surg. 2013 Dec	231	Risk group: gastric resection and cancer	included				34	15485481	15485481,"A population-based intervention study on elevated serum levels of methylmalonic acid and total homocysteine in elderly people: results after 36 months of follow-up","Björkegren K, Svärdsudd K.","J Intern Med. 2004 Nov	398	Treatment not RCT 3 years with FA+B12, not isolated B12 deficiency	included		0.01		41	22690982	22690982,"Relationship between vitamin B12 and sensory and motor peripheral nerve function in older adults","Leishear K, Boudreau RM, Studenski SA, Ferrucci L, Rosano C, de Rekeneire N, Houston DK, Kritchevsky SB, Schwartz AV, Vinik AI, Hogervorst E, Yaffe K, Harris TB, Newman AB, Strotmeyer ES	261	Neurological aspects of B12 deficiency	included	0
									35	18032219	18032219,"Age-related hearing loss, methylmalonic acid, and vitamin B12 status in older adults","Park S, Johnson MA, Shea-Miller K, De Chicchis AR, Allen RH, Stabler SP.","J Nutr Elder. 2006	343	B12 deficiency and hearing loss incl. Treatment with B12	included		0.01		42	17991650	17991650,"Low vitamin B-12 status and risk of cognitive decline in older adults","Clarke R, Birks J, Nexo E, Ueland PM, Schneede J, Scott J, Molloy A, Evans JG.","Am J Clin Nutr. 2007 Nov	344	Longitudinal association of B12 status and cog. Decline	included	0
33	22387252	22387252,"Common features of patients with autoimmune atrophic gastritis","Miceli E, Lenti MV, Padula D, Luinetti O, Vattiato C, Monti CM, Di Stefano M, Corazza GR.","Clin Gastroenterol Hepatol. 2012 Jul	270	atrophic gastritis associated symptoms	included											0.01		43	17515548	17515548,"Neurologic complications of gastric bypass surgery for morbid obesity","Juhasz-Pocsine K, Rudnicki SA, Archer RL, Harik SI.","Neurology. 2007 May 22	350	B12 deficeincy and mylopathy in obese people	26 patients with major and disabling neurologic conditions attributed to bariatric surgery (not necessarily B12 deficiency)	0
34	36307840	36307840,"Vitamin B12 deficiency may play an etiological role in atrophic glossitis and its grading: A clinical case-control study","Chen GY, Tang ZQ, Bao ZX.","BMC Oral Health. 2022 Oct 28	5	atrophic glossitis	included											0.01		44	17308217	17308217,"Comparison of clinical and electrodiagnostic features in B12 deficiency neurological syndromes with and without antiparietal cell antibodies","Misra UK, Kalita J.","Postgrad Med J. 2007 Feb	354	Neurological symptoms of B12 and anti-parital cell antibodies	included	0
35	29599609	29599609,"Correlation between serum vitamin B12 level and peripheral neuropathy in atrophic gastritis","Yang GT, Zhao HY, Kong Y, Sun NN, Dong AQ.","World J Gastroenterol. 2018 Mar 28	113	Risk group: B12 in atrophic gastritis and neuropathy	included											0.01		45	16930287	16930287,"Dorsal sural nerve conduction study in vitamin B(12) deficiency with megaloblastic anemia","Turgut B, Turgut N, Akpinar S, Balci K, Pamuk GE, Tekgündüz E, Demir M.","J Peripher Nerv Syst. 2006 Sep	366	Megaloblastic anemia and nerve conduction studies in B12 deficiency	included	0
36	28917233	28917233,"High prevalence of vitamin B-12 insufficiency in patients with Crohn's disease","Ao M, Tsuji H, Shide K, Kosaka Y, Noda A, Inagaki N, Nakase H, Tanaka K.","Asia Pac J Clin Nutr. 2017	127	At risk group: Crohn disease	included											0.01		46	12613142	12613142,"Vitamin B12 deficiency neurological syndromes: a clinical, MRI and electrodiagnostic study","Misra UK, Kalita J, Das A.","Electromyogr Clin Neurophysiol. 2003 Jan-Feb	429	Neurology clinical and electrophysiology	included	0
37	26452305	26452305,"Symptoms and findings in adult-onset celiac disease in a historical Danish patient cohort","Schøsler L, Christensen LA, Hvas CL.","Scand J Gastroenterol. 2016 Mar	176	Risk group: Celiac disease	included													47	22049200	22049200,"Neuropathy in Parkinson disease: prevalence and determinants","Rajabally YA, Martey J.","Neurology. 2011 Nov 29	278	Risk group: Parkinson	included	0
38	16522380	16522380,"Vitamin B12 deficiency in patients with upper gastrointestinal symptoms in the Mekong Delta, Vietnam","v Nguyen T, van Oijen MG, Janssen MJ, Laheij RJ, Jansen JB, van Asten H.","Dig Liver Dis. 2006 Jun	375	Association of B12 deficiency in people with upper gastrointestinal symptoms	included													48	34035493	34035493,"Patients with unexplained neurological symptoms and signs should be screened for vitamin B12 deficiency regardless of haemoglobin levels","Maghsoudlou P, Varlamova J, Pandit J.","Eye (Lond). 2022 May	36	Unexplained neurological symptoms without anemia	included	0
																		49	16218195	16218195,"Vitamin B12 deficiency: a clinical and electrophysiological profile","Puri V, Chaudhry N, Goel S, Gulati P, Nehru R, Chowdhury D.","Electromyogr Clin Neurophysiol. 2005 Jul-Aug	379	Neurology, electrophysiology, non-controlled treatment over 1 year	included	0
39	20391044	20391044,"Vitamin B(12) deficiency is linked with long-term use of proton pump inhibitors in institutionalized older adults: could a cyanocobalamin nasal spray be beneficial?","Rozgony NR, Fang C, Kuczmarski MF, Bob H.","J Nutr Elder. 2010 Jan	307	Risk group: PPI use and cobalamin treatment	included													50	15805657	15805657,"Clinical and laboratory features and response to treatment in patients presenting with vitamin B12 deficiency-related neurological syndromes","Aaron S, Kumar S, Vijayan J, Jacob J, Alexander M, Gnanamuthu C.","Neurol India. 2005 Mar	390	Neurology, clinical and laboratory	included	0
40	18315582	18315582,"Vitamin B12 deficiency in hypersecretors during long-term acid suppression with proton pump inhibitors","Hirschowitz BI, Worthington J, Mohnen J.","Aliment Pharmacol Ther. 2008 Jun 1	339	Risk group: PPI use	included													51	15003773	15003773,"A sequential study of visual evoked potential in patients with vitamin B12 deficiency neurological syndrome","Pandey S, Kalita J, Misra UK.","Clin Neurophysiol. 2004 Apr	410	Neurological Symptoms and B12	included	0
41	35896125	35896125,"Proton pump inhibitor use and its effect on vitamin B12 and homocysteine levels among men and women: A large cross-sectional study","Lerman TT, Cohen E, Sochat T, Goldberg E, Goldberg I, Krause I.","Am J Med Sci. 2022 Dec	10	risk group: Proton pump inhibitor	included													52	12975298	12975298,"Challenges in the identification of cobalamin-deficiency polyneuropathy","Saperstein DS, Wolfe GI, Gronseth GS, Nations SP, Herbelin LL, Bryan WW, Barohn RJ.","Arch Neurol. 2003 Sep	419	Neuropathy and B12	included	0
																		53	18350363	18350363,"Vitamin B12 deficiency neurological syndromes: correlation of clinical, MRI and cognitive evoked potential","Kalita J, Misra UK.","J Neurol. 2008 Mar	338	Neurological symptoms of B12 deficiency	included	0
42	20603044	20603044,"Serum vitamin B12 and folate status in patients with inflammatory bowel diseases","Yakut M, Ustün Y, Kabaçam G, Soykan I.","Eur J Intern Med. 2010 Aug	302	Risk group inflammatory bowel diseases (Crohn, ulcerative colitis)	included													54	18779510	18779510,"Vitamin B12 status and rate of brain volume loss in community-dwelling elderly","Vogiatzoglou A, Refsum H, Johnston C, Smith SM, Bradley KM, de Jager C, Budge MM, Smith AD.","Neurology. 2008 Sep 9	332	B12 markers and brain volume loss	included	0
43	27769076	27769076,"The role of dietary supplements in inflammatory bowel disease: a systematic review","Rossi RE, Whyand T, Murray CD, Hamilton MI, Conte D, Caplin ME.","Eur J Gastroenterol Hepatol. 2016 Dec	149	B12 in inflammatory bowel diseases- syst review	included													55	24225845	24225845,"Vitamin B12 deficiency in relation to functional disabilities","Oberlin BS, Tangney CC, Gustashaw KA, Rasmussen HE.","Nutrients. 2013 Nov 12	225	B12 deficiency and functional disabilities	included	0
44	28406440	28406440,"Associations between Folate and Vitamin B12 Levels and Inflammatory Bowel Disease: A Meta-Analysis","Pan Y, Liu Y, Guo H, Jabir MS, Liu X, Cui W, Li D.","Nutrients. 2017 Apr 13	135	Risk group inflammatory bowel diseases (Crohn, ulcerative colitis)	included													56	24256995	24256995,"Clinical, nerve conduction and nerve biopsy study in vitamin B12 deficiency neurological syndrome with a short-term follow-up","Kalita J, Chandra S, Bhoi SK, Agarwal R, Misra UK, Shankar SK, Mahadevan A.","Nutr Neurosci. 2014 Jul	223	Neurology, treated, nerve biopsy	included	0
45	29669023	29669023,"The Relevance of Vitamin and Iron Deficiency in Patients with Inflammatory Bowel Diseases in Patients of the Swiss IBD Cohort","Madanchi M, Fagagnini S, Fournier N, Biedermann L, Zeitz J, Battegay E, Zimmerli L, Vavricka SR, Rogler G, Scharl M	109	Risk group inflammatory bowel diseases (Crohn, ulcerative colitis)	included																			0
																								0
	Elderly people in general				included																			0
46	33120734	33120734,"Association between frailty and vitamin B12 in the older Korean population","Soh Y, Won CW.","Medicine (Baltimore). 2020 Oct 23	49	risk group: elderly	included																			0
47	26807790	26807790,"Methylmalonic Acid and Homocysteine as Indicators of Vitamin B-12 Deficiency in Cancer","Vashi P, Edwin P, Popiel B, Lammersfeld C, Gupta D.","PLoS One. 2016 Jan 25	170	Risk group: patients with cancer	included																			0
48	30919610	30919610,"Vitamins B12 and D deficiencies and macro- and microelement disturbances among diabetic elderly patients","Dziegielewska-Gesiak S, Fatyga E, Kasiarz G, Wilczynski T, Muc-Wierzgon M, Kokot T.","J Biol Regul Homeost Agents. 2019 Mar-Apr,	86	Risk group: elderly with diabetes	included																			0
49	32297187	32297187,"No association between subnormal serum vitamin B12 and anemia in older nursing home patients","Abrahamsen JF, Monsen AB, Ranhoff AH, Nilsen RM, Engtrø E, Rekdal M, Kruger K.","Eur Geriatr Med. 2020 Apr	63	Risk group: elderly and anemia	included																			0
50	30670531	30670531,"Vitamin B ((12)) deficiency and hyperhomocysteinaemia in outpatients with stroke or transient ischaemic attack: a cohort study at an academic medical centre","Ahmed S, Bogiatzi C, Hackam DG, Rutledge AC, Sposato LA, Khaw A, Mandzia J, Azarpazhoo MR, Hachinski V, Spence JD.","BMJ Open. 2019 Jan 21	91	Risk group: elderly with stroke	included																			0
51	28549839	28549839,"Vitamin B12 deficiency might be related to sarcopenia in older adults","Ates Bulut E, Soysal P, Aydin AE, Dokuzlar O, Kocyigit SE, Isik AT.","Exp Gerontol. 2017 Sep	131	Risk group: Elderly sarcopenia	included																			0
52	25651452	25651452,"Cobalamin deficiency in the elderly: aetiology and management: a study of 125 patients in a geriatric hospital","Couderc AL, Camalet J, Schneider S, Turpin JM, Bereder I, Boulahssass R, Gonfrier S, Bayer P, Guerin O, Brocker P.","J Nutr Health Aging. 2015 Feb	191	Risk group: elderly people	included																			0
53	22456786	22456786,"Vitamin B12 deficiency in Australian residential aged care facilities","Mirkazemi C, Peterson GM, Tenni PC, Jackson SL.","J Nutr Health Aging. 2012 Mar	265	Risk group: elderly	included
54	20573208	20573208,"Subnormal vitamin B12 concentrations and anaemia in older people: a systematic review","den Elzen WP, van der Weele GM, Gussekloo J, Westendorp RG, Assendelft WJ.","BMC Geriatr. 2010 Jun 23	304	Syst. Review Risk group: elderly people	included
55	16194648	16194648,"Food-cobalamin malabsorption in elderly patients: clinical manifestations and treatment","Andrès E, Affenberger S, Vinzio S, Kurtz JE, Noel E, Kaltenbach G, Maloisel F, Schlienger JL, Blicklé JF.","Am J Med. 2005 Oct	380	Risk group: elderly	included
	Other risk groups
56	20206879	20206879,"Functional vitamin B12 deficiency in alcoholics: an intriguing finding in a retrospective study of megaloblastic anemic patients","Fragasso A, Mannarella C, Ciancio A, Sacco A.","Eur J Intern Med. 2010 Apr	310	Risk group: alcoholism-Megaloblastic anemia and B12 deficiency	included
57	29446340	29446340,"Identification of vitamin B12 deficiency in vegetarian Indians","Naik S, Mahalle N, Bhide V.","Br J Nutr. 2018 Mar	118	Risk group vegetarians	included
58	24422907	24422907,"Hydroxocobalamin supplementation and erythropoisis stimulating agent hyporesponsiveness in haemodialysis patients","Killen JP, Brenninger VL.","Nephrology (Carlton). 2014 Mar	214	Risk group: patients on hemodialysis treated with OH-B12	Excluded: pre-post study, no control group, not randomized, unblinded
59	29614799	29614799,"Folate and B12 Levels Correlate with Histological Severity in NASH Patients","Mahamid M, Mahroum N, Bragazzi NL, Shalaata K, Yavne Y, Adawi M, Amital H, Watad A.","Nutrients. 2018 Apr 2	111	Risk group: NASH/fatty liver	included
60	34134041	34134041,"Hyperhomocysteinemia and low vitamin B12 are associated with the risk of early pregnancy loss: A clinical study and meta-analyses","Bala R, Verma R, Verma P, Singh V, Yadav N, Rajender S, Agrawal NR, Singh K.","Nutr Res. 2021 Jul	35	risk group: pregnant women- Meta-analysis	included
61	22424943	22424943,"Does an elevated serum vitamin B(12) level mask actual vitamin B(12) deficiency in myeloproliferative disorders?","Gauchan D, Joshi N, Gill AS, Patel V, Debari VA, Guron G, Maroules M.","Clin Lymphoma Myeloma Leuk. 2012 Aug	267	Diagnosing B12 deficiency in myeloproliferative cancers	included
62	27003903	27003903,"Functional vitamin B12 deficiency in advanced malignancy: implications for the management of neuropathy and neuropathic pain","Solomon LR.","Support Care Cancer. 2016 Aug	162	Risk group: advanced malignancy	included
